# Supplementary material for: A Systems Approach to Study Immuno- and Neuro-Modulatory Properties of Antiviral Agents
Source: Preprints.org preprint supplement (doi:10.20944/preprints201807.0518.v1), 2018-07-26
Supplement: Supplementary file 1 [file supplementary]

## Supplementary information

**Table S1.** Approved, investigational and experimental antiviral agents and their side effects (if known).

| Agent        | Status   | Virus | Potential target    | Reference* | Side effects, if known                                                                                                            |
|--------------|----------|-------|---------------------|------------|-----------------------------------------------------------------------------------------------------------------------------------|
| Abacavir     | Approved | HIV-1 | HIV-1 RT            | DB01048    | Allergic reactions, lactic acidosis, liver toxicity, risk of heart attack, nausea, vomiting, lethargy, fever, headache, diarrhea. |
|              |          | HIV-2 | HIV-2 RT            |            |                                                                                                                                   |
| Aciclovir    | Approved | HSV-1 | HSV-1 DNA pol       | DB00787    | Nausea, diarrhea, headache, vomiting, kidney toxicity, low platelets.                                                             |
|              |          | HSV-2 | HSV-2 DNA pol       |            |                                                                                                                                   |
|              |          | VZV   | VZV DNA pol         |            |                                                                                                                                   |
| Adefovir     | Approved | HBV   | HBV RT              | DB13868    | Weakness, headache, fever, increased cough, nausea, vomiting, diarrhea, skin rash.                                                |
| Alitreinoin  | Approved | HHV-8 | Human RARA          | DB00523    | Skin reactions, photosensitivity, numbness, muscle aches.                                                                         |
| Amantadine   | Approved | FLUAV | FLUAV M2            | DB00915    | Nausea, diarrhea, constipation, headache, insomnia, blurred vision, loss of coordination, rash, confusion.                        |
| Amprenavir   | Approved | HIV-1 | HIV-1 RT            | DB00701    | Gastrointestinal symptoms (nausea, abdominal pain, diarrhea), paresthesia, depression, rash.                                      |
| Asunaprevir  | Approved | HCV   | HCV protease        | DB11586    | Flu-like symptoms, hair loss, nausea, rash, anemia, clotting problems, liver toxicity.                                            |
| Atazanavir   | Approved | HIV-1 | HIV-1 RT            | DB01072    | Arrhythmia, rash, liver toxicity, flu-like symptoms.                                                                              |
|              |          | HIV-2 | HIV-2 RT            |            |                                                                                                                                   |
| BCX4430      | Approved | HCV   | HCV RNA pol         | DB11676    | N. a.                                                                                                                             |
| Brivudine    | Approved | HSV-1 | HSV-1 DNA pol       | DB03312    | Nausea, headache, lowered blood cell counts, liver toxicity, allergic reactions.                                                  |
|              |          | VZV   | VZV DNA pol         |            |                                                                                                                                   |
| Cidofovir    | Approved | CMV   | CMV DNA pol         | DB00369    | Headache, nausea, vomiting, abdominal pain, rash, liver toxicity.                                                                 |
| Cobicistat   | Approved | HIV-1 | HIV-1 integrase     | DB09065    | Nausea, dizziness, liver and kidney toxicity,                                                                                     |
|              |          | HIV-2 | HIV-2 integrase     |            |                                                                                                                                   |
| Daclatasvir  | Approved | HCV   | HCV NS5A            | DB09102    | Headache, nausea, diarrhea, insomnia, rash, anemia.                                                                               |
| Darunavir    | Approved | HIV-1 | HIV-1 protease      | DB01264    | Diarrhea, nausea, rash, headache, stomach pain, vomiting, liver toxicity.                                                         |
| Dasabuvir    | Approved | HCV   | HCV RNA pol         | DB09183    | Weakness, rash, liver toxicity, anemia.                                                                                           |
| Delavirdine  | Approved | HIV-1 | HIV-1 RT            | DB00705    | Nausea, diarrhea, headache, changes in body fat, flu-like symptoms.                                                               |
| Didanosine   | Approved | HIV-1 | HIV-1 RT            | DB00900    | Headache, diarrhea, rash, changes in body fat, liver toxicity, seizures.                                                          |
|              |          | HIV-2 | HIV-2 RT            |            |                                                                                                                                   |
| Docosanol    | Approved | HSV-1 | HSV-1 glycoproteins | DB00632    | Allergic reactions, rash, headache.                                                                                               |
|              |          | HSV-2 | HSV-2 glycoproteins |            |                                                                                                                                   |
| Dolutegravir | Approved | HIV-1 | HIV-1 integrase     | DB08930    | Insomnia, fatigue, headache, liver toxicity.                                                                                      |
|              |          | HIV-2 | HIV-2 integrase     |            |                                                                                                                                   |
| Dronabinol   | Approved | HIV-1 | Human CNR1          | DB00470    | Seizures, anxiety, arrhythmia, dizziness, lack of coordination, insomnia, gastrointestinal toxicity.                              |

|               |          |       |                 |         |                                                                                                                                      |
|---------------|----------|-------|-----------------|---------|--------------------------------------------------------------------------------------------------------------------------------------|
| Efavirenz     | Approved | HIV-1 | HIV-1 RT        | DB00625 | Mental health problems, liver toxicity, severe rash, birth defects in animals.                                                       |
| Elbasvir      | Approved | HCV   | HCV NS5A        | DB11574 | Fatigue, headache, gastrointestinal symptoms, rash, arthralgia, anemia.                                                              |
| Elvitegravir  | Approved | HIV-1 | HIV-1 integrase | DB09101 | Alterations of immune system, diarrhea, nausea, rash, gastrointestinal toxicity.                                                     |
|               |          | HIV-2 | HIV-2 integrase |         |                                                                                                                                      |
| Emtricitabine | Approved | HIV-1 | HIV-1 RT        | DB00879 | Flu-like symptoms, paresthesia, arrhythmia, gastrointestinal toxicity, liver toxicity, insomnia.                                     |
|               | Approved | HIV-2 | HIV-2 RT        |         |                                                                                                                                      |
| Enfuvirtide   | Approved | HIV-1 | HIV-1 gp41      | DB00109 | Local reactions, numbness, insomnia, depression, arthralgia, arrhythmia, vision changes, flu-like symptoms, Guillain-Barre Syndrome. |
| Entecavir     | Approved | HBV   | HBV DNA pol     | DB00442 | Lliver toxicity, lactic acidosis, arrhythmia, gastrointestinal toxicity, hair loss, insomnia.                                        |
| Etravirine    | Approved | HIV-1 | HIV-1 RT        | DB06414 | Severe skin rash, allergic reactions, arthralgia, liver toxicity, gastrointestinal toxicity.                                         |
| Famciclovir   | Approved | HSV-1 | HSV-1 DNA pol   | DB00426 | Headache, nausea, diarrhea, liver and kidney toxicity, mental/mood changes.                                                          |
|               |          | HSV-2 | HSV-2 DNA pol   |         |                                                                                                                                      |
|               |          | VZV   | VZV DNA pol     |         |                                                                                                                                      |
| Favipiravir   | Approved | FLUAV | FLUBV RNA pol   | DB12466 | N. a.                                                                                                                                |
|               |          | FLUCV | FLUCV RNA pol   |         |                                                                                                                                      |
|               |          | FLUBV | FLUAV RNA pol   |         |                                                                                                                                      |
| Fomivirsen    | Approved | CMV   | CMV mRNA UL123  | DB06759 | Eye inflammation, vision abnormalities, cataracts, retinal detachment, anemia, flu-like symptoms, rash                               |
| Fosamprenavir | Approved | HIV-1 | HIV-1 protease  | DB01319 | Severe skin reactions, allergic reactions, gastrointestinal symptoms, headache.                                                      |
| Foscarnet     | Approved | CMV   | CMV DNA pol     | DB00529 | Headache, gastrointestinal toxicity, mental/mood changes, arrhythmia, muscle cramps.                                                 |
|               |          | HSV-1 | HSV-1 DNA pol   |         |                                                                                                                                      |
|               |          | HSV-2 | HSV-2 DNA pol   |         |                                                                                                                                      |
| Ganciclovir   | Approved | CMV   | CMV DNA pol     | DB01004 | Local reactions, gastrointestinal toxicity, tremors, infertility.                                                                    |
| Glecaprevir   | Approved | HCV   | HCV protease    | DB13879 | Diarrhea, headache, nausea, itching skin, weakness.                                                                                  |
| Grazoprevir   | Approved | HCV   | HCV protease    | DB11575 | Headache, gastrointestinal toxicity, rash, arthralgia, depression, anemia.                                                           |
| HBIG          | Approved | HBV   | HBV proteins    | DB05276 | Flu-like symptoms, back pain, gastrointestinal symptoms, serious allergic reactions, fever, liver toxicity, risk of stroke.          |
| Idoxuridine   | Approved | HSV-1 | HSV-1 DNA pol   | DB00249 | Eye irritation, pain, swelling, increased sensitivity to light.                                                                      |
| Imiquimod     | Approved | HPV   | Human TLR7      | DB00724 | Local skin reactions, headache, flu-like symptoms, chest and back pain, gastrointestinal symptoms.                                   |
| IMOGAM        | Approved | RABV  | RABV proteins   | DB11603 | Headache, flu-like symptoms, gastrointestinal symptoms, rash, allergic reactions.                                                    |
| Indinavir     | Approved | HIV-1 | HIV-1 protease  | DB00224 | Kidney and liver toxicity, hemolytic anemia, gastrointestinal toxicity, arthralgia, thyroid toxicity.                                |
|               |          | HIV-2 | HIV-2 protease  |         |                                                                                                                                      |

|                       |          |       |                 |         |                                                                                                                           |
|-----------------------|----------|-------|-----------------|---------|---------------------------------------------------------------------------------------------------------------------------|
| Interferon alfacon 1  | Approved | HCV   | Human IFNAR1    | DB00069 | Mood changes, headache, gastrointestinal symptoms, arthralgia.                                                            |
| Lamivudine            | Approved | HBV   | HBV RT          | DB00709 | Headache, gastrointestinal and liver toxicity, rash, pancreatitis, anemia, fat redistribution.                            |
|                       |          | HIV-1 | HIV-1 RT        |         |                                                                                                                           |
|                       |          | HIV-2 | HIV-2 RT        |         |                                                                                                                           |
| Laninamivir octanoate | Approved | FLUBV | FLUBV NA        | DB11888 | Psychiatric disorders, gastrointestinal symptoms, dizziness.                                                              |
|                       |          | FLUAV | FLUAV NA        |         |                                                                                                                           |
| Ledipasvir            | Approved | HCV   | HCV NS5A        | DB09027 | Fatigue, headache, nausea, diarrhea, insomnia.                                                                            |
| Letermovir            | Approved | CMV   | CMV TRM1        | DB12070 | Cough, headache, gastrointestinal toxicity.                                                                               |
| Lopinavir             | Approved | HIV-1 | HIV-1 protease  | DB01601 | Headache, fat redistribution, gastrointestinal symptoms, liver toxicity, allergic reactions, flu-like symptoms, insomnia. |
|                       |          | HIV-2 | HIV-2 protease  |         |                                                                                                                           |
| Maraviroc             | Approved | HIV-1 | Human CCR5      | DB04835 | Liver toxicity, skin rash, allergic reactions, flu-like symptoms.                                                         |
|                       |          | HIV-2 | Human CCR5      |         |                                                                                                                           |
| Nelfinavir            | Approved | HIV-1 | HIV-1 protease  | DB00220 | Allergic reactions, confusion, high blood sugar, bleedings, risk of infections and autoimmune disorders.                  |
|                       |          | HIV-2 | HIV-2 protease  |         |                                                                                                                           |
| Nevirapine            | Approved | HIV-1 | HIV-1 RT        | DB00238 | Gastrointestinal toxicity, muscle pain, headache, body fat redistribution.                                                |
| Ombitasvir            | Approved | HCV   | HCV NS5A        | DB09296 | Nausea, weakness, insomnia, allergic reactions.                                                                           |
| Oseltamivir           | Approved | FLUBV | FLUBV NA        | DB00198 | Headache, gastrointestinal symptoms, insomnia, nosebleed, mental/mood changes.                                            |
|                       |          | FLUAV | FLUAV NA        |         |                                                                                                                           |
| Palivizumab           | Approved | RSV   | RSV F           | DB00110 | Cold symptoms, gastrointestinal symptoms, rash, local reactions.                                                          |
| Paritaprevir          | Approved | HCV   | HCV protease    | DB09297 | Fatigue, skin reactions, insomnia, weakness.                                                                              |
| PegIFN $\alpha$ -2a   | Approved | HBV   | Human IFNAR1    | DB00008 | Flu-like symptoms, anemia, leukopenia.                                                                                    |
|                       |          | HCV   | Human IFNAR1    |         |                                                                                                                           |
| PegIFN $\alpha$ -2b   | Approved | HBV   | Human IFNAR1    | DB00022 | Leukopenia, thyroid dysfunction.                                                                                          |
|                       |          | HCV   | Human IFNAR1    |         |                                                                                                                           |
| Penciclovir           | Approved | HSV-1 | HSV-1 DNA pol   | DB00299 | Application site reactions, headache, allergic reactions                                                                  |
|                       |          | HSV-2 | HSV-2 DNA pol   |         |                                                                                                                           |
| Peramivir             | Approved | FLUBV | FLUBV NA        | DB06614 | Diarrhea, constipation, insomnia, high blood pressure, allergic reactions.                                                |
|                       |          | FLUAV | FLUAV NA        |         |                                                                                                                           |
| Pibrentasvir          | Approved | HCV   | HCV NS5A        | DB13878 | Headache, nausea, diarrhea, itching.                                                                                      |
| Podofilox             | Approved | HPV   | Human TOP2A     | DB01179 | Skin reactions, insomnia, nausea, vomiting.                                                                               |
| Raltegravir           | Approved | HIV-1 | HIV-1 integrase | DB06817 | Gastrointestinal toxicity, insomnia, body fat redistribution.                                                             |
|                       |          | HIV-2 | HIV-2 integrase |         |                                                                                                                           |
| Ribavirin             | Approved | HCV   | HCV RNA pol     | DB00811 | Hemolytic anemia, increased risk of heart attack, arrhythmia, teratogenic effect.                                         |
|                       |          | RSV   | RSV RNA pol     |         |                                                                                                                           |
| Rilpivirine           | Approved | HIV-1 | HIV-1 RT        | DB08864 | Severe rash, allergic reactions, liver toxicity, depression, body fat redistribution, insomnia.                           |

|                       |          |       |                |         |                                                                                                               |
|-----------------------|----------|-------|----------------|---------|---------------------------------------------------------------------------------------------------------------|
| Rimantadine           | Approved | FLUAV | FLUAV M2       | DB00478 | Insomnia, allergic reactions, mental/mood changes, seizures.                                                  |
| Ritonavir             | Approved | HIV-1 | HIV-1 protease | DB00503 | Gastrointestinal symptoms, headache, Guillain-Barre syndrome, thyroid toxicity, alterations of immune system. |
|                       |          | HIV-2 | HIV-2 protease |         |                                                                                                               |
| RSV-IGIV (RespiGam)   | Approved | RSV   | RSV F          | N.A.    | Nausea, local reactions, myalgia/arthralgia, liver toxicity, allergic reactions, aseptic meningitis.          |
| Saquinavir            | Approved | HIV-1 | HIV-1 protease | DB01232 | Gastrointestinal toxicity, body fat redistribution, arrhythmia, liver toxicity.                               |
|                       |          | HIV-2 | HIV-2 protease |         |                                                                                                               |
| Simeprevir            | Approved | HCV   | HCV protease   | DB06290 | Rash, sun sensitivity, nausea, myalgia.                                                                       |
| Sinecatechins         | Approved | HPV   | Unknown        | DB01266 | Local skin reactions, allergic reactions.                                                                     |
| Sofosbuvir            | Approved | HCV   | HCV RNA pol    | DB08934 | Nausea, diarrhea, headache, anemia, allergic reactions.                                                       |
| Stavudine             | Approved | HIV-1 | HIV-1 RT       | DB00649 | Headache, diarrhea, myalgia/arthralgia, vision changes, thyroid toxicity, Guillain-Barre syndrome.            |
| Telaprevir            | Approved | HCV   | HCV protease   | DB05521 | Allergic reaction, skin reactions, gastrointestinal toxicity.                                                 |
| Telbivudine           | Approved | HBV   | HBV RT         | DB01265 | Dizziness, diarrhea, headache, allergic reactions.                                                            |
| Tenofovir alafenamide | Approved | HBV   | HBV RT         | DB09299 | Abdominal pain, nausea, osteoporosis, pneumonia.                                                              |
| Tenofovir disoproxil  | Approved | HBV   | HBV RT         | DB00300 | Gastrointestinal symptoms, mental/mood changes, rash.                                                         |
|                       |          | HIV-1 | HIV-1 RT       |         |                                                                                                               |
|                       |          | HIV-2 | HIV-2 RT       |         |                                                                                                               |
| Thymalfasin           | Approved | HBV   | Unknown        | DB04900 | Muscle atrophy, arthralgia, rash, local reactions.                                                            |
|                       |          | HCV   | Unknown        |         |                                                                                                               |
| Tipranavir            | Approved | HIV-1 | HIV-1 protease | DB00932 | Liver toxicity, risk of stroke, gastrointestinal toxicity, body fat redistribution.                           |
| Trifluridine          | Approved | HSV-1 | HSV-1 DNA pol  | DB00432 | Eye irritation, blurred vision, allergic reactions.                                                           |
|                       |          | HSV-2 | HSV-2 DNA pol  |         |                                                                                                               |
|                       |          | VACV  | VACV DNA pol   |         |                                                                                                               |
| Valacyclovir          | Approved | CMV   | CMV DNA pol    | DB00577 | Headache, mental/mood changes, kidney toxicity, allergic reactions.                                           |
|                       |          | EBV   | EBV DNA pol    |         |                                                                                                               |
|                       |          | HBV   | HBV DNA pol    |         |                                                                                                               |
|                       |          | HSV-1 | HSV-1 DNA pol  |         |                                                                                                               |
|                       |          | HSV-2 | HSV-2 DNA pol  |         |                                                                                                               |
|                       |          | VZV   | VZV DNA pol    |         |                                                                                                               |
| Valganciclovir        | Approved | CMV   | CMV DNA pol    | DB01610 | Diarrhea, kidney toxicity, mental/mood changes, allergic reactions, seizures.                                 |
| VariZIG               | Approved | VZV   | VZV proteins   | DB11621 | Flu-like symptoms, local reactions, allergic reaction, arthralgia.                                            |
| Velpatasvir           | Approved | HCV   | HCV NS5A       | DB11613 | Headache, insomnia, anemia, rash, depression.                                                                 |
| Vidarabine            | Approved | HSV-1 | HSV-1 DNA pol  | DB00194 | Lacrimation, photophobia, keratitis, irritation.                                                              |
|                       |          | HSV-2 | HSV-2 DNA pol  |         |                                                                                                               |
|                       |          | VZV   | VZV DNA pol    |         |                                                                                                               |

|                       |                 |       |                  |             |                                                                                             |
|-----------------------|-----------------|-------|------------------|-------------|---------------------------------------------------------------------------------------------|
| Voxilaprevir          | Approved        | HCV   | HCV protease     | DB12026     | Allergic reactions, liver toxicity, diarrhea.                                               |
| Zalcitabine           | Approved        | HIV-1 | HIV-1 RT         | DB00943     | Constipation, diarrhea, headache, body fat redistribution, convulsions, allergic reactions. |
|                       |                 | HIV-2 | HIV-2 RT         |             |                                                                                             |
| Zanamivir             | Approved        | FLUBV | FLUBV NA         | DB00558     | Dizziness, allergic reactions.                                                              |
|                       |                 | FLUAV | FLUAV NA         |             |                                                                                             |
| Zidovudine            | Approved        | HIV-1 | HIV-1 RT         | DB00495     | Headache, nausea, insomnia, arthralgia, thyroid toxicity, Guillain-Barre syndrome.          |
|                       |                 | HIV-2 | HIV-2 RT         |             |                                                                                             |
| ABI-H0731             | Investigational | HBV   | HBV Cp           | NCT03109730 | N. a.                                                                                       |
| ABX464                | Investigational | HIV-1 | HIV-1 RT         | NCT02990325 | Headache, nausea, vomiting.                                                                 |
|                       |                 | HIV-2 | HIV-2 RT         | NCT02990325 |                                                                                             |
| ACH-2684              | Investigational | HCV   | HCV protease     | N.A.        | N. a.                                                                                       |
| ACH-3422              | Investigational | HCV   | HCV RNA pol      | N.A.        | N. a.                                                                                       |
| AK0529                | Investigational | RSV   | RSV F            | NCT02654171 | N. a.                                                                                       |
| Albuterpenoid         | Investigational | MCV   | Unknown          | N.A.        | N. a.                                                                                       |
| ALN-HBV               | Investigational | HBV   | HBV mRNA         | NCT02826018 | N. a.                                                                                       |
| Alisporivir           | Investigational | HCV   | Human PPIA       | NCT02094443 | Nausea, headache, liver toxicity.                                                           |
| ALS-008176            | Investigational | RSV   | RSV RNA pol      | NCT02673476 | Epistaxis, cough.                                                                           |
| ALS-8112              | Investigational | RSV   | RSV RNA pol      | N.A.        | N. a.                                                                                       |
| ALX-0171              | Investigational | RSV   | RSV F            | NCT02979431 | N. a.                                                                                       |
| APH-0812              | Investigational | HIV-1 | Human PKC        | N.A.        | N. a.                                                                                       |
| Aprepitant            | Investigational | HIV-1 | Human TAKR1      | NCT02154360 | Gastrointestinal toxicity, insomnia, headache, flu-like symptoms.                           |
| ARB-1467 (ARB-001467) | Investigational | HBV   | HBV transcripts  | NCT02631096 | N. a.                                                                                       |
| Astodimer             | Investigational | HIV-1 | HIV-1 gp120      | NCT00740584 | Genitourinary symptoms, bacterial vaginosis, bleeding between menstrual periods.            |
|                       |                 | HSV-2 | HSV-2 DNA pol    | NCT00740584 |                                                                                             |
| AV4025                | Investigational | HCV   | HCV NS5A         | N.A.        | N. a.                                                                                       |
| AVI-7100              | Investigational | FLUAV | FLUAV M1/M2 mRNA | NCT01747148 | Headache, proteinuria.                                                                      |
| AVI-7288              | Investigational | MARV  | MARV NP mRNA     | NCT01566877 | N. a.                                                                                       |
| AVI-7537              | Investigational | EBOV  | EBOV VP24 mRNA   | NCT01593072 | Headache, nausea, fatigue.                                                                  |
| AVR560                | Investigational | HCV   | Unknown          | N.A.        | N. a.                                                                                       |
| Bavituximab           | Investigational | HCV   | Human Ptd-L-Ser  | NCT01273948 | Anemia, neutropenia, fatigue.                                                               |
|                       |                 | HIV-1 | Human Ptd-L-Ser  | NCT00503347 |                                                                                             |
| BCX4430               | Investigational | EBOV  | EBOV RNA pol     | NCT02319772 | N. a.                                                                                       |
|                       |                 | HCV   | Human PPIA       | N.A.        |                                                                                             |
|                       |                 | MARV  | MARV RNA pol     | N.A.        |                                                                                             |
| Beraprost             | Investigational | FLUAV | Human CYP2C8     | N.A.        | Headache, diarrhea.                                                                         |
| Bictegravir           | Investigational | HIV-1 | HIV-1 integrase  | NCT02603107 | Headache, nausea, diarrhea, insomnia.                                                       |
| Birinapant            | Investigational | HBV   | Human IAP        | NCT02288208 | N. a.                                                                                       |
| BIT225                | Investigational | HCV   | HCV p7           | N.A.        | N. a.                                                                                       |
| BL-8020               | Investigational | HCV   | Unknown          | N.A.        | N. a.                                                                                       |
| BMS-955176            | Investigational | HIV-1 | HIV-1 GAG        | NCT01803074 | Headache, liver toxicity, diarrhea.                                                         |

|                          |                 |       |                 |             |                                                                                   |
|--------------------------|-----------------|-------|-----------------|-------------|-----------------------------------------------------------------------------------|
| Brincidofovir            | Investigational | AdV   | AdV DNA pol     | NCT02087306 | Renal toxicity, abdominal cramps, diarrhea.                                       |
|                          |                 | BKV   | Unknown         | NCT01769170 |                                                                                   |
|                          |                 | CMV   | CMV DNA pol     | NCT01769170 |                                                                                   |
|                          |                 | EBV   | EBV DNA pol     | NCT01769170 |                                                                                   |
|                          |                 | HHV-6 | HHV-6 DNA pol   | NCT01769170 |                                                                                   |
| BTA074 (AP611074)        | Investigational | HPV   | HPV E1 and E2   | NCT02724254 | N. a.                                                                             |
| BTL-TML-001              | Investigational | FLUAV | Unknown         | N.A.        | N. a.                                                                             |
| BTL-TML-HSV              | Investigational | HSV-1 | Unknown         | NCT01902303 | N. a.                                                                             |
| Cabotegravir             | Investigational | HIV-1 | HIV-1 integrase | NCT02951052 | Headache, flu-like symptoms, diarrhea.                                            |
| CC-31244                 | Investigational | HCV   | HCV RNA pol     | NCT02760758 | N. a.                                                                             |
| Cenicriviroc             | Investigational | HIV-1 | Human CCR5      | NCT01338883 | Nausea, headache, diarrhea.                                                       |
| Cidofovir                | Investigational | BKV   | BKV DNA pol     | NCT03216967 | Liver and gastrointestinal toxicity, vision changes, allergic reactions.          |
|                          |                 | CMV   | CMV DNA pol     | NCT00002437 |                                                                                   |
|                          |                 | HPV   | HPV DNA pol     | NCT00550589 |                                                                                   |
|                          |                 | HSV-1 | HSV-1 DNA pol   | NCT01431326 |                                                                                   |
|                          |                 | HSV-2 | HSV-2 DNA pol   | NCT01431326 |                                                                                   |
| Ciprofloxacin            | Investigational | BKV   | Human TOP2A     | NCT01789203 | Headache, insomnia, gastrointestinal and liver toxicity, renal toxicity, allergic |
| Civacir                  | Investigational | HCV   | HCV proteins    | NCT01804829 | Flu-like syndrome, allergic reactions.                                            |
| Clemizole                | Investigational | HCV   | HCV NS4B        | NCT00945880 | N. a.                                                                             |
| Chloroquine              | Investigational | FLUAV | Human TNF       | NCT01078779 | Gastrointestinal toxicity, mental/mood changes, liver toxicity, bleedings.        |
| Cyclopropavir            | Investigational | CMV   | CMV UL97        | NCT02454699 | N. a.                                                                             |
| CYT107                   | Investigational | HBV   | Human CD127     | NCT01027065 | Liver toxicity, rash, local reactions, flu-like symptoms.                         |
|                          |                 | HCV   | Human CD127     | NCT01025596 |                                                                                   |
|                          |                 | HIV-1 | Human CD127     | NCT01019551 |                                                                                   |
| Cytolin                  | Investigational | HIV-1 | Human CD11a     | N.A.        | N. a.                                                                             |
| Danoprevir               | Investigational | HCV   | HCV protease    | NCT03020082 | Flu-like syndrome, headache, anemia, neutropenia.                                 |
| DAS181                   | Investigational | FLUAV | Human SA        | NCT01037205 | Increase of alkaline phosphatase level                                            |
| Doravirine               | Investigational | HIV-1 | HIV-1 RT        | NCT02403674 | Nausea, depression, diarrhea, insomnia.                                           |
| EDP-239                  | Investigational | HCV   | HCV NS5A        | NCT01856426 | N. a.                                                                             |
| EDP-494                  | Investigational | HCV   | Human PPIA      | NCT02652377 | N. a.                                                                             |
| Emricasan                | Investigational | HCV   | Human CASP1     | NCT00088140 | Headache, nausea, fatigue.                                                        |
| Enzaplatovir (BTA585)    | Investigational | RSV   | RSV F           | NCT02718937 | N. a.                                                                             |
| Everolimus               | Investigational | BKV   | Human MTOR      | NCT01624948 | Gastrointestinal and liver toxicity, headache, arthralgia, myalgia.               |
|                          |                 | HCV   | Human MTOR      | NCT01134952 |                                                                                   |
| EYP001                   | Investigational | HBV   | Human IFNAR1    | NCT03272009 | Gastrointestinal symptoms, headache, muscular cramps.                             |
| Faldaprevir              | Investigational | HCV   | HCV protease    | NCT01297270 | Gastrointestinal symptoms, anemia, rash.                                          |
| Favipiravir              | Investigational | EBOV  | EBOV RNA pol    | NCT02329054 | N. a.                                                                             |
| Fostemsavir (BMS-663068) | Investigational | HIV-1 | HIV-1 GP120     | NCT02362503 | Headache, rash, gastrointestinal toxicity.                                        |
| FV-100                   | Investigational | VZV   | VZV DNA pol     | NCT02412917 | Gastrointestinal toxicity, headache, trembling.                                   |

|                           |                 |       |                        |             |                                                                            |
|---------------------------|-----------------|-------|------------------------|-------------|----------------------------------------------------------------------------|
| GS-5734                   | Investigational | EBOV  | EBOV RNA pol           | NCT02818582 | N. a.                                                                      |
| GS-5806                   | Investigational | RSV   | RSV F                  | NCT02135614 | N. a.                                                                      |
| GSK3228836 (IONIS HBVRx)  | Investigational | HBV   | HBV RNA                | NCT02981602 | N. a.                                                                      |
| GSK3389404                | Investigational | HBV   | HBV RNA                | NCT03020745 | N. a.                                                                      |
| Ibalizumab                | Investigational | HIV-1 | Human CD4              | NCT02475629 | Diarrhea, anemia, rash, liver toxicity.                                    |
| IDX375                    | Investigational | HCV   | HCV RNA pol            | N.A.        | N. a.                                                                      |
| IFN-alpha 2B-XL           | Investigational | HBV   | Human IFNAR1           | N.A.        | Flu-like symptoms, liver toxicity, arrhythmia, nausea, allergic reactions. |
|                           |                 | HCV   | Human IFNAR1           | NCT01010646 |                                                                            |
| IQP-0528                  | Investigational | HIV-1 | HIV-1 RT               | NCT03082690 | N. a.                                                                      |
| JNJ-56914845 (GSK2336805) | Investigational | HCV   | HCV NS5A               | NCT01439373 | N. a.                                                                      |
| Lomibuvir (VX-222)        | Investigational | HCV   | HCV protease           | NCT01516918 | N. a.                                                                      |
| Lonafarnib                | Investigational | HDV   | Human FTI              | NCT02511431 | Diarrhea, nausea, weight loss.                                             |
| Maribavir                 | Investigational | CMV   | CMV DNA pol            | NCT00497796 | Taste disturbances, diarrhea, rash, anemia.                                |
| MDT-637                   | Investigational | RSV   | RSV F                  | NCT01355016 | N. a.                                                                      |
| MEDI8852                  | Investigational | FLUAV | FLUAV HA               | NCT03028909 | Headache                                                                   |
| MEDI8897                  | Investigational | RSV   | RSV F                  | NCT02878330 | Headache, dermatitis.                                                      |
| Mericitabine              | Investigational | HCV   | HCV RNA pol            | NCT01482390 | Headache, nausea, diarrhea, flu-like syndrome, insomnia, dizziness.        |
| Merimepodib               | Investigational | HCV   | Human IMPDH2           | NCT00088504 | Nausea, arthralgia, dyspnea, neutropenia, anemia.                          |
| Miravirsen                | Investigational | HCV   | Human miR-122          | NCT01200420 | N. a.                                                                      |
| MK-3682                   | Investigational | HCV   | HCV RNA pol            | NCT02332720 | Headache, nausea, fatigue.                                                 |
| Mycophenolic acid         | Investigational | BKV   | Human IMPDH2           | NCT01624948 | Gastrointestinal toxicity, insomnia, myalgia, headache.                    |
| Mycludex B                | Investigational | HBV   | HBV pre-S1             | NCT02888106 | Local reactions, increased liver enzymes level.                            |
| Namodenoson (CF-102)      | Investigational | HCV   | Human A3AR             | NCT00790673 | N. a.                                                                      |
| Nitazoxanide              | Investigational | FLUAV | FLUAV HA               | NCT02612922 | Headache, gastrointestinal symptoms.                                       |
|                           |                 | HCV   | Human PKR              | NCT01770483 |                                                                            |
| N-Methanocarbothymidine   | Investigational | HSV-2 | HSV-2 DNA pol          | N.A.        | N. a.                                                                      |
| Odalasvir                 | Investigational | HCV   | HCV NS5A               | NCT03099135 | Headache, fatigue, upper respiratory tract infections.                     |
| OHR118                    | Investigational | HIV-1 | Human ACVR2B           | N.A.        | N. a.                                                                      |
|                           |                 | HPV   | Human ACVR2B           | N.A.        |                                                                            |
| Paritaprevir              | Investigational | HCV   | HCV protease           | NCT02992457 | Rash, insomnia, allergic reactions.                                        |
| PEG-Interferon lambda     | Investigational | HCV   | Human IL28R            | NCT01598090 | Elevated liver enzymes.                                                    |
| PEG-P-IFN alpha-2b        | Investigational | HCV   | Human IFNAR1           | NCT00351871 | Headache, hematologic abnormalities, flu-like syndrome.                    |
| Pimodivir                 | Investigational | FLUAV | FLUAV RNA pol          | NCT03376321 | Diarrhea, nausea.                                                          |
| Polyacrylic acid          | Investigational | HIV-1 | HIV-1 Tat              | NCT00446979 | Blurred vision, burning.                                                   |
| PPI-461                   | Investigational | HCV   | HCV NS5A               | NCT01247194 | N. a.                                                                      |
| Pritelivir                | Investigational | HSV-1 | HSV-1 helicase-primase | NCT03073967 | Local skin reactions.                                                      |
|                           |                 | HSV-2 | HSV-2 helicase-primase | NCT01047540 |                                                                            |

|                               |                 |          |                    |             |                                                                                                       |
|-------------------------------|-----------------|----------|--------------------|-------------|-------------------------------------------------------------------------------------------------------|
| Rapamycin                     | Investigational | CMV      | Human MTOR         | NCT02683291 | Thrombocytopenia, nephrotoxicity, altered insulin sensitivity.                                        |
| Ravidasvir                    | Investigational | HCV      | HCV NS5A           | NCT03362814 | Headache, diarrhea, itching.                                                                          |
| RDEA806                       | Discontinued    | HIV-1    | HIV-1 RT           | NCT00617526 | N. a.                                                                                                 |
| REGN2222                      | Investigational | RSV      | RSV F              | NCT02325791 | Injection site reactions, allergic reactions.                                                         |
| REP2139                       | Investigational | HBV      | Unknown            | NCT02233075 | N. a.                                                                                                 |
| Rifamycin                     | Investigational | HCV      | Human NR1I2        | N.A.        | Gastrointestinal and liver toxicity, headache, drowsiness, heartburn.                                 |
|                               |                 | HIV-1    | Human NR1I2        | N.A.        |                                                                                                       |
| Rintatolimod (ampligen)       | Investigational | FLUAV    | Human TLR3         | NCT01591473 | Flu-like symptoms, flushing.                                                                          |
|                               |                 | HIV-1    | Human TLR3         | NCT00035893 |                                                                                                       |
| RV521                         | Investigational | RSV      | RSV F              | NCT03258502 | N. a.                                                                                                 |
| S-033188 (baloxavir marboxil) | Investigational | FLUAV    | FLUAV RNA pol      | NCT02954354 | Headache, diarrhea, increased liver enzymes                                                           |
| Samatasvir                    | Investigational | HCV      | HCV NS5A           | NCT01852604 | N. a.                                                                                                 |
| SB 9200                       | Investigational | HBV      | Human DDX58        | NCT02751996 | N. a.                                                                                                 |
|                               |                 | HCV      | Human DDX58        | NCT01803308 |                                                                                                       |
| SB-728-T                      | Investigational | HIV-1    | Human CCR5         | NCT01543152 | Infusion-related reactions.                                                                           |
| SCY-635                       | Investigational | HCV      | Human PPIA         | NCT01265511 | N. a.                                                                                                 |
| SD-101                        | Investigational | HCV      | Human TLR9         | NCT00823862 | N. a.                                                                                                 |
| Simvastatin                   | Investigational | HCV      | Human HMGCR        | NCT01377909 | Memory problems, diabetes, liver toxicity, allergic reactions.                                        |
| Sorivudine                    | Investigational | VZV      | VZV DNA pol        | NCT00002358 | N. a.                                                                                                 |
| TD-6450                       | Investigational | HCV      | HCV NS5A           | NCT02593162 | N. a.                                                                                                 |
| Tenofovir disoproxil          | Investigational | HSV-2    | HSV-2 DNA pol      | NCT01386294 | Lactic acidosis, liver toxicity,                                                                      |
| Thymalfasin                   | Investigational | HIV-1    | Unknown            | NCT00001036 | Depression, insomnia, body fat redistribution, gastrointestinal toxicity.                             |
| TMC278                        | Investigational | HIV-1    | HIV-1 RT           | NCT01777997 | Gastrointestinal symptoms, rash, depression, body fat redistribution, insomnia.                       |
| TMC647055                     | Investigational | HCV      | HCV RNA pol        | NCT01724086 | N. a.                                                                                                 |
| Traumakine                    | Investigational | FLUAV    | Human IFNAR1       | N.A.        | N. a.                                                                                                 |
| UV-4B                         | Investigational | DENV     | Human glucosidases | NCT02061358 | Osmotic diarrhea.                                                                                     |
|                               |                 | EBOV     | Human glucosidases | N.A.        |                                                                                                       |
| VIS410                        | Investigational | FLUAV    | FLUAV HA           | NCT03040141 | Diarrhea, headache.                                                                                   |
| VX-135                        | Investigational | HCV      | HCV RNA pol        | NCT01726946 | Fatigue, headache, nausea.                                                                            |
| Acetaminophen                 | Experimental    | DENV     | DENV NS4B          | 26856827    | Allergic reactions, rash, dizziness.                                                                  |
| Acetylsalicylic acid          | Experimental    | HCV      | Human PTGS1        | 26289738    | Rash, gastrointestinal toxicity, drowsiness, bleedings.                                               |
|                               |                 | HSV-1    | Human PTGS1        | 24768597    |                                                                                                       |
|                               |                 | FLUAV    | Human PTGS1        | 17324159    |                                                                                                       |
| Alemtuzumab                   | Experimental    | HIV-1    | Human CD52         | 27482429    | Nausea, dizziness, vomiting, headache, sweating, mental/mood changes, nephrotoxicity, liver toxicity. |
| Alisporivir                   | Experimental    | HIV-1    | Human PPIA         | 19857522    | N. a.                                                                                                 |
|                               |                 | MERS-CoV | Human PPIA         | 27840112    |                                                                                                       |

|                      |              |       |                        |          |                                                                                           |
|----------------------|--------------|-------|------------------------|----------|-------------------------------------------------------------------------------------------|
| Amiodarone           | Experimental | EBOV  | Human KCNH2            | 25933611 | Nausea, vomiting, constipation, tremor, insomnia, headache.                               |
| Anakinra             | Experimental | FLUAV | Human IL1R1            | 28740490 | Worsening of rheumatoid arthritis symptoms, nausea, diarrhea, headache, local reactions.  |
| Arsenic trioxide     | Experimental | EBV   | Human IKBKB            | 28637474 | Gastrointestinal toxicity, arrhythmia, rash, arthralgia, insomnia.                        |
|                      |              | HPV   | Human IKBKB            | 25117446 |                                                                                           |
| Artemether           | Experimental | EBOV  | Human CYP3A4           | 26735991 | Diarrhea, headache, nausea, dizziness, fainting, rash, insomnia, arthralgia, myalgia.     |
| Atorvastatin         | Experimental | DENV  | Human HMGCR            | 27431377 | Myalgia, confusion, memory problems, fever, fluid retention, liver toxicity.              |
| Azacitidine          | Experimental | AdV   | AdV DNA pol            | 11562975 | Nausea, anemia, thrombocytopenia, leukopenia, fever, diarrhea, rash.                      |
|                      |              | FLUAV | FLUAV RNA pol          | 11562975 |                                                                                           |
|                      |              | HIV-1 | HIV-1 RT               | 27117260 |                                                                                           |
|                      |              | HIV-2 | HIV-2 RT               | 25103850 |                                                                                           |
| Azelastine           | Experimental | HBV   | Human NTCP             | 24965018 | Drowsiness, nose bleeds, nausea, dry mouth, weight gain, headache, myalgia.               |
| Azithromycin         | Experimental | EBOV  | Human PADI4            | 27622822 | Gastrointestinal symptoms, liver toxicity, allergic reactions, arrhythmia.                |
|                      |              | HRV-A | Human PADI4            | 28415826 |                                                                                           |
|                      |              | ZIKV  | Human PADI4            | 27911847 |                                                                                           |
| BCX4430              | Experimental | RAVV  | RAVV RNA pol           | 24590073 | N. A.                                                                                     |
|                      |              | TBEV  | TBEV RNA pol           | 28336346 |                                                                                           |
|                      |              | WNV   | WNV RNA pol            | 28336346 |                                                                                           |
|                      |              | YFV   | YFV RNA pol            | 25155605 |                                                                                           |
|                      |              | ZIKV  | ZIKV RNA pol           | 27838352 |                                                                                           |
| Bepotastine besilate | Experimental | EMCV  | Human HRH1             | 18606918 | Headache, eye irritation, allergic reactions.                                             |
| Betamethasone        | Experimental | FLUAV | Human CYP3A4           | 21168053 | Acne, dry skin, insomnia, sweating, headache, nausea.                                     |
| Bortezomib           | Experimental | DENV  | Human PSMB5            | 26565697 | Gastrointestinal toxicity, arthralgia, myalgia, insomnia, rash.                           |
|                      |              | HBV   | Human PSMB5            | 19949053 |                                                                                           |
|                      |              | FLUAV | Human PSMB5            | 20592098 |                                                                                           |
|                      |              | RSV   | Human PSMB5            | 19931343 |                                                                                           |
|                      |              | RVFV  | Human PSMB5            | 26001632 |                                                                                           |
|                      |              | VSV   | Human PSMB5            | 20592098 |                                                                                           |
|                      |              | ZIKV  | Human PSMB5            | 27476412 |                                                                                           |
| Bosentan             | Experimental | HEV-B | Human EDNRB            | 20392896 | Nausea, liver toxicity, headache, flushing, itching.                                      |
| Bromocriptine        | Experimental | DENV  | DENV protease-helicase | 27181378 | Drowsiness, spinning sensation, headache, insomnia, dry mouth, gastrointestinal symptoms. |
|                      |              | ZIKV  | ZIKV protease          | 28185815 |                                                                                           |
| Budesonide           | Experimental | HRV-B | Human CYP3A4           | 24998372 | Headache, sore throat, nausea, rash, myalgia.                                             |
|                      |              | HRV-A | Human CYP3A4           | 24219422 |                                                                                           |
| Cabozantinib         | Experimental | ZIKV  | Human MET              | 27650556 | Insomnia, nervousness, stomach irritation, nausea, vomiting, increased heart rate.        |
| Caffeine             | Experimental | HCV   | Human ADORA1           | 25491197 |                                                                                           |

|                |              |           |               |          |                                                                                                       |
|----------------|--------------|-----------|---------------|----------|-------------------------------------------------------------------------------------------------------|
|                |              | HSV-1     | Human ADORA1  | 21725588 |                                                                                                       |
|                |              | FLUAV     | Human ADORA1  | 25050906 |                                                                                                       |
|                |              | JV        | Human ADORA1  | 10509392 |                                                                                                       |
|                |              | VZV       | Human ADORA1  | 6257827  |                                                                                                       |
| Capsaicin      | Experimental | HSV-2     | Human TRPV1   | 10543747 | Skin redness, itching, burning, pain.                                                                 |
| Ceftazidime    | Experimental | HIV-1     | Human SLC22A5 | 11527042 | Muscle spasms, seizures, nephrotoxicity, liver toxicity, abdominal pain.                              |
| Chloroquine    | Experimental | CHIKV     | Human TNF     | 21503920 | Seizures, gastrointestinal symptoms, hypotension, retinopathy, nausea, hair loss, skin reactions.     |
|                |              | DENV      | Human TNF     | 25664975 |                                                                                                       |
|                |              | EBOV      | Human TNF     | 27622822 |                                                                                                       |
|                |              | HCoV-OC43 | Human TNF     | 27381385 |                                                                                                       |
|                |              | HHV-8     | Human TNF     | 27521848 |                                                                                                       |
|                |              | SARS-CoV  | Human TNF     | 14592603 |                                                                                                       |
|                |              | ZIKV      | Human TNF     | 27916837 |                                                                                                       |
| Ciclopirox     | Experimental | HIV-1     | Human eIF5A   | 19825182 | Itching, redness, discoloration of nails.                                                             |
| Cidofovir      | Experimental | B19V      | Unknown       | 25446336 | Nausea, vomiting, diarrhea, headache, rash, hair loss.                                                |
|                |              | BKV       | Unknown       | 25790744 |                                                                                                       |
| Cimetidine     | Experimental | HIV-1     | Human HRH2    | 8950301  | Headache, diarrhea, hallucinations, confusion, depression, arthralgia, breast swelling in men.        |
|                |              | HSV-2     | Human HRH2    | 2561403  |                                                                                                       |
| Ciprofloxacin  | Experimental | BKV       | Human parC    | 25790744 | Drowsiness, diarrhea, nausea, anxiety, insomnia.                                                      |
| Clarithromycin | Experimental | EBOV      | Human KCNH2   | 27890675 | Vomiting, diarrhea, tooth discoloration, headache, rash.                                              |
| Clemastine     | Experimental | RSV       | Human HRH1    | 8729205  | Drowsiness, headache, constipation, dry mouth, trouble walking.                                       |
| Clofarabine    | Experimental | HIV-1     | HIV-1 RT      | 27009333 | Leukopenia, anemia, infection, vomiting, nausea, diarrhea, rash, fever.                               |
|                |              | HIV-2     | HIV-2 RT      | 25103850 |                                                                                                       |
| Clomiphene     | Experimental | EBOV      | Human ESR1    | 23785035 | Dizziness, vaginal bleeding, flushing.                                                                |
|                |              | HPV       | Human ESR1    | 8835432  |                                                                                                       |
| Cromoglycate   | Experimental | FLUAV     | Human KCNMA1  | 26176755 | Difficulty swallowing, difficulty breathing, rash, allergic reactions.                                |
|                |              | RSV       | Human KCNMA1  | 19107959 |                                                                                                       |
| Cyclosporine   | Experimental | HCV       | Human PPIA    | 16382464 | Shaking, headache, dizziness, nausea, vomiting, diarrhea.                                             |
|                |              | FLUAV     | Human PPIA    | 16382464 |                                                                                                       |
|                |              | ZIKV      | Human PPIA    | 27476412 |                                                                                                       |
|                |              | WNV       | WNV RNA pol   | 19451286 |                                                                                                       |
| Cysteamine     | Experimental | HIV-1     | Human NPY2R   | 8655998  | Vomiting, anorexia, fever, diarrhea, lethargy, rash, nausea.                                          |
| Cytarabine     | Experimental | HSV-1     | HSV-1 DNA pol | 4364763  | Fever, nausea, vomiting, loss of bowel or bladder control, problems with vision or hearing, seizures. |
| Dalbavancin    | Experimental | EBOV      | Human CYP3A4  | 26953343 | Gastrointestinal toxicity, anemia, thrombocytopenia, liver toxicity, infusion site reactions.         |
|                |              | MERS-CoV  | Human CYP3A4  | 26953343 |                                                                                                       |
|                |              | SARS-CoV  | Human CYP3A4  | 26953343 |                                                                                                       |
|                |              | ZIKV      | Unknown       | 27476412 |                                                                                                       |

|                    |              |       |                |          |                                                                                        |
|--------------------|--------------|-------|----------------|----------|----------------------------------------------------------------------------------------|
| Dasatinib          | Experimental | BKV   | Human ABL1     | 21088155 | Anemia, thrombocytopenia, diarrhea, headache, bleeding, rash, nausea, fluid retention. |
|                    |              | DENV  | Human ABL1     | 23616652 |                                                                                        |
|                    |              | HCV   | Human ABL1     | 28674529 |                                                                                        |
|                    |              | HIV-1 | Human ABL1     | 26851491 |                                                                                        |
| Decitabine         | Experimental | HIV-1 | HIV-1 RT       | 1691617  | Headache, gastrointestinal symptoms, nausea, insomnia, drowsiness.                     |
| Deferiprone        | Experimental | HIV-1 | Human eIF5A    | 19825182 | Nausea, vomiting, diarrhea, neutropenia, arthralgia.                                   |
| Desmethylclozapine | Experimental | DENV  | Human DRD2     | 27572397 | Gastrointestinal toxicity, nausea.                                                     |
| Dexamethasone      | Experimental | VSV   | Human NR3C1    | 2154755  | Insomnia, mood change, acne, sweating, headache, nausea, vomiting.                     |
| Dibucaine          | Experimental | HEV-A | HEV-A helicase | 26856848 | Allergic reactions, bleedings, skin irritation.                                        |
|                    |              | HEV-B | HEV-B helicase | 26856848 |                                                                                        |
|                    |              | HEV-D | HEV-D helicase | 26856848 |                                                                                        |
| Dihydroergotamine  | Experimental | HSV-1 | Human HTR1D    | 14116560 | Changed sense of taste, sore throat, vomiting, nausea, nose bleeds, headache.          |
| Diltiazem          | Experimental | HRV-A | Human CACNA1C  | 16054245 | Dizziness, nausea, headache, flushing, fainting, arrhythmia.                           |
| Dimethyl fumarate  | Experimental | HIV-1 | Human RELA     | 21976775 | Flushing, abdominal pain, nausea, diarrhea, vomiting, rash.                            |
| Dipyridamole       | Experimental | HSV-1 | Human PDE10A   | 11709364 | Dizziness, diarrhea, vomiting, headache, rash, arthralgia.                             |
| Dorzolamide        | Experimental | FLUAV | FLUAV NA       | 26833677 | Cloudy vision, drooping eyelid, flu symptoms, nausea.                                  |
| Doxycycline        | Experimental | CHIKV | Human PADI4    | 25970853 | Diarrhea, abdominal pain, rash, hypoglycemia, hemolytic anemia.                        |
|                    |              | DENV  | Human PADI4    | 2414227  |                                                                                        |
|                    |              | VSV   | Human PADI4    | 26459887 |                                                                                        |
| Dronedarone        | Experimental | EBOV  | Human ADRA1A   | 25933611 | Diarrhea, nausea, heartburn, weakness, rash.                                           |
| Enalapril          | Experimental | DENV  | Human ACE      | 26321474 | Blurred vision, confusion, sweating, diarrhea.                                         |
| Erlotinib          | Experimental | BKV   | Human EGFR     | 21088155 | Rash, diarrhea, fatigue, nausea, vomiting, infection.                                  |
|                    |              | EBOV  | Human EGFR     | 28240606 |                                                                                        |
|                    |              | HCV   | Human EGFR     | 28240606 |                                                                                        |
| Esomeprazole       | Experimental | EBOV  | Human ATP4A    | 26069727 | Dizziness, confusion, jerking muscle movements, diarrhea, muscle cramps.               |
|                    |              | FLUAV | Human ATP4A    | 26069727 |                                                                                        |
|                    |              | MARV  | Human ATP4A    | 26069727 |                                                                                        |
| Estradiol          | Experimental | HCV   | Human ER       | 27885811 | Stomach cramps, nausea, breast pain, hair loss, changes in menstrual period.           |
|                    |              | FLUAV | Human ER       | 28557314 |                                                                                        |
| Etodolac           | Experimental | HCV   | HCV RNA pol    | 25676325 | Diarrhea, constipation, gas, rash, headache, blurred vision.                           |
| Ezetimibe          | Experimental | HBV   | Human NTCP     | 25034482 | Numbness, diarrhea, headache, depression, arthralgia, back pain.                       |
|                    |              | HCV   | Human NTCP     | 27493122 |                                                                                        |
|                    |              | HDV   | Human NTCP     | 24717262 |                                                                                        |
| Famotidine         | Experimental | HIV-1 | Human HRH2     | 8950301  | Gastrointestinal symptoms, headache, nausea, muscle cramps, arthralgia.                |
| Fenofibrate        | Experimental | JEV   | Human PPARA    | 24780919 | Severe abdominal pain, nausea, vomiting, flu-like symptoms, liver toxicity.            |
| Finasteride        | Experimental | ZIKV  | Human SRD5A2   | 27919709 | Impotence, swelling of breasts, swelling of hands and feet, headache.                  |

|                     |              |          |                   |          |                                                                                                  |
|---------------------|--------------|----------|-------------------|----------|--------------------------------------------------------------------------------------------------|
| Fluoxetine          | Experimental | HEV-B    | HEV-B helicase    | 23335743 | Drowsiness, nausea, constipation, impotence, insomnia.                                           |
|                     |              | HEV-C    | HEV-C helicase    | 23335743 |                                                                                                  |
|                     |              | DENV     | Human SLC6A4      | 27572397 |                                                                                                  |
|                     |              | HCV      | Human SLC6A4      | 25151487 |                                                                                                  |
| Fluvastatin         | Experimental | DENV     | Human HMGCR       | 27431377 | Myalgia, diarrhea, constipation, headache, rash, infection.                                      |
|                     |              | HCV      | Human HMGCR       | 24260365 |                                                                                                  |
|                     |              | FLUAV    | Human HMGCR       | 24676773 |                                                                                                  |
| Formoterol          | Experimental | HEV-B    | HEV-B helicase    | 26856848 | Allergic reactions, dizziness, tremor, insomnia, chest pain, muscle cramps.                      |
|                     |              | HRV-B    | Human CYP2D6      | 24998372 |                                                                                                  |
| Gefitinib           | Experimental | BKV      | Human EGFR        | 21088155 | Skin reaction, dry eyes, vomiting diarrhea, bleedings.                                           |
|                     |              | CMV      | Human EGFR        | 18329738 |                                                                                                  |
|                     |              | VACV     | Human EGFR        | 21094187 |                                                                                                  |
| Gemcitabine         | Experimental | HEV-B    | Human RRM1        | 26526589 | Increased risk of infection, bleedings from gums, nosebleeds, liver toxicity, flu-like symptoms. |
|                     |              | HIV-1    | Human RRM1        | 24120088 |                                                                                                  |
|                     |              | HRV-A    | Human RRM1        | 28705625 |                                                                                                  |
|                     |              | HSV-1    | Human RRM1        | 22910914 |                                                                                                  |
|                     |              | FLUAV    | Human RRM1        | 22910914 |                                                                                                  |
|                     |              | PV       | Human RRM1        | 27733043 |                                                                                                  |
|                     |              | SINV     | Human RRM1        | 22910914 |                                                                                                  |
|                     |              | VACV     | Human RRM1        | 28607950 |                                                                                                  |
|                     |              | ZIKV     | Human RRM1        | 28049006 |                                                                                                  |
|                     |              |          |                   |          |                                                                                                  |
| Gemfibrozil         | Experimental | HPIV-1   | Human PPARA       | 27915128 | Gastrointestinal symptoms, impotence, nausea, drowsiness, myalgia.                               |
| Hydroxychloroquine  | Experimental | DENV     | Human TNF         | 25321315 | Headache, nausea, hair loss, rash, vomiting, spinning sensation.                                 |
|                     |              | HIV-1    | Human TNF         | 8565026  |                                                                                                  |
|                     |              | ZIKV     | Human TNF         | 28694387 |                                                                                                  |
| Hydroxyurea         | Experimental | B19V     | Human RRM1        | 28377277 | Hair loss, rash, diarrhea, vomiting, headache, weight gain.                                      |
|                     |              | HIV-1    | Human RRM1        | 8852387  |                                                                                                  |
| Ibuprofen           | Experimental | EBOV     | EBOV glycoprotein | 28930583 | Gastrointestinal symptoms, nausea, nervousness, rash, headache, heartburn.                       |
|                     |              | HSV-1    | Human PTGS2       | 24768597 |                                                                                                  |
| Imatinib            | Experimental | BKV      | Human BCR/ABL     | 21088155 | Nausea, diarrhea, headache, leg cramps, anemia, risk of infection, bleeding, insomnia.           |
|                     |              | HCV      | Human BCR/ABL     | 28674529 |                                                                                                  |
|                     |              | MERS-CoV | Human BCR/ABL     | 27466418 |                                                                                                  |
|                     |              | SARS-CoV | Human BCR/ABL     | 27466418 |                                                                                                  |
| Indomethacin        | Experimental | HIV-1    | Human PTGS1       | 7875307  | Gas, rectal irritation, drowsiness, rash, blurred vision, headache.                              |
|                     |              | HSV-1    | Human PTGS1       | 1964373  |                                                                                                  |
|                     |              | SARS-CoV | Human PTGS1       | 17302372 |                                                                                                  |
|                     |              | VSV      | Human PTGS1       | 25856684 |                                                                                                  |
| Interferon Beta 1-A | Experimental | HCV      | Human IFNAR1      | 16344588 | Flu-like syndrome, allergic reactions.                                                           |
| Itraconazole        | Experimental | HEV-B    | Human ERG11       | 25640182 | Diarrhea, constipation, nausea, rash, arthralgia, myalgia, headache.                             |
|                     |              | HRV-B    | Human ERG11       | 25640182 |                                                                                                  |

|                |              |           |                   |          |                                                                              |
|----------------|--------------|-----------|-------------------|----------|------------------------------------------------------------------------------|
|                |              | HRV-A     | Human ERG11       | 26976677 |                                                                              |
|                |              | SAFV      | Human ERG11       | 25640182 |                                                                              |
| Ivermectin     | Experimental | CHIKV     | Human GABRB3      | 26752081 | Headache, dizziness, myalgia, diarrhea.                                      |
|                |              | DENV      | Human GABRB3      | 22535622 |                                                                              |
|                |              | HIV-1     | Human GABRB3      | 22417684 |                                                                              |
|                |              | SINV      | Human GABRB3      | 26752081 |                                                                              |
|                |              | YFV       | Human GABRB3      | 26752081 |                                                                              |
|                |              | ZIKV      | Human GABRB3      | 27476412 |                                                                              |
| Ketoconazole   | Experimental | HSV-1     | Human ERG11       | 3021048  | Gastrointestinal symptoms, rash, headache, impotence.                        |
| Lansoprazole   | Experimental | HRV-B     | Human ATP4A       | 15733557 | Diarrhea, stomach pain, nausea, constipation, headache.                      |
| Leflunomide    | Experimental | BKV       | Human DHODH       | 22461534 | Gastrointestinal symptoms, nausea, rash, weight loss, back pain.             |
|                |              | CMV       | Human DHODH       | 26652481 |                                                                              |
|                |              | EBV       | Human DHODH       | 28574826 |                                                                              |
| Letermovir     | Experimental | HSV-1     | HSV-1 terminase   | 23885997 | Diarrhea, nausea, vomiting, peripheral edema, headache, abdominal pain.      |
| Levocetirizine | Experimental | HRV-A     | Human HRH1        | 19110001 | Drowsiness, weakness, vomiting, diarrhea, constipation.                      |
|                |              | BKV       | Human TOP2A       | 24482066 |                                                                              |
| Lopinavir      | Experimental | ZIKV      | ZIKV protease     | 28712942 | Nausea, vomiting, rash, body fat redistribution, headache.                   |
|                |              | MERS-CoV  | MERS-CoV protease | 26198719 |                                                                              |
| Lovastatin     | Experimental | DENV      | Human HMGCR       | 24586275 | Stomach pain, nausea, constipation, myalgia, memory loss, insomnia.          |
|                |              | HPIV-1    | Human HMGCR       | 27915128 |                                                                              |
|                |              | RSV       | Human HMGCR       | 11257039 |                                                                              |
| Mefloquine     | Experimental | EBOV      | Human HBA1        | 27890675 | Depression, hallucinations, vomiting, diarrhea, fever.                       |
| Memantine      | Experimental | FLUAV     | FLUAV M2          | 9588841  | Gastrointestinal toxicity, weight loss, bleedings, arthralgia, anxiety.      |
|                |              | HCoV-OC43 | Human GRIN3A      | 24227863 |                                                                              |
|                |              | HIV-1     | Human GRIN3A      | 1707644  |                                                                              |
|                |              | ZIKV      | Human GRIN3A      | 28442607 |                                                                              |
| Metformin      | Experimental | HEV-B     | Human PRKAB1      | 24403577 | Weakness, myalgia, insomnia, dizziness, nausea.                              |
|                |              | DENV      | Human PRKAB1      | 28384260 |                                                                              |
|                |              | HBV       | Human PRKAB1      | 24164660 |                                                                              |
|                |              | HHV-8     | Human PRKAB1      | 27147746 |                                                                              |
|                |              | FLUAV     | Human PRKAB1      | 23831494 |                                                                              |
| Midostaurin    | Experimental | EBV       | Human PRKCA       | 23058855 | Flu-like symptoms, trouble breathing, nausea, diarrhea, arthralgia, myalgia. |
| Mifepristone   | Experimental | HIV-1     | Human NR1I2       | 16889838 | High fever, severe pelvic pain, vomiting, nausea, diarrhea.                  |
| Miltefosine    | Experimental | HIV-1     | Human ABCB1       | 22704066 | Vomiting, nausea, drowsiness, weakness.                                      |
| Minocycline    | Experimental | DENV      | Human PADI4       | 27396621 | Dizziness, myalgia, nausea, diarrhea, rash.                                  |
|                |              | HIV-1     | Human PADI4       | 24409837 |                                                                              |
|                |              | WNV       | Human PADI4       | 28878079 |                                                                              |
| Mitoxantrone   | Experimental | HIV-1     | Human TOP2A       | 8460151  |                                                                              |

|                      |              |          |               |          |                                                                                 |
|----------------------|--------------|----------|---------------|----------|---------------------------------------------------------------------------------|
|                      |              | VACV     | Human TOP2A   | 17928345 | Nausea, diarrhea, constipation, heartburn, hair loss, heavy menstrual bleeding. |
| Montelukast          | Experimental | FLUAV    | Human CYSLTR1 | 27094326 | Rash, tremor, headache, heartburn, nausea, diarrhea.                            |
| Mycophenolic acid    | Experimental | HCV      | Human IMPDH2  | 22728816 | Diarrhea, stomach pain, nausea, vomiting weight loss, fever, weakness.          |
|                      |              | RSV      | Human IMPDH2  | 28775087 |                                                                                 |
|                      |              | CHIKV    | Human IMPDH2  | 21070810 |                                                                                 |
|                      |              | DENV     | Human IMPDH2  | 12504563 |                                                                                 |
|                      |              | ZIKV     | Human IMPDH2  | 27476412 |                                                                                 |
| Nalidixic acid       | Experimental | FLUAV    | FLUAV NA      | 26833677 | Diarrhea, drowsiness, headache, nausea, vomiting.                               |
| Nalmefene            | Experimental | RSV      | Human OPRM    | 23222260 | Headache, dizziness, fever, somnolence, tremor, confusion, myoclonus.           |
| Naloxone             | Experimental | HCV      | Human OPRM    | 22614935 | Chest pain, severe nausea and vomiting, seizures, agitation, anxiety.           |
| Naproxen             | Experimental | FLUAV    | FLUAV NP      | 23459490 | Gastrointestinal symptoms, nausea, heartburn, dizziness.                        |
| Nicotine             | Experimental | HEV-B    | Human CHRNA4  | 26851533 | Headache, constipation, dizziness.                                              |
| Nilotinib            | Experimental | EBOV     | Human ABL1    | 22378924 | Diarrhea, constipation, blood in urine and stool, arrhythmia, rash.             |
| Nitazoxanide         | Experimental | CHIKV    | Human PKR     | 27742486 | Nausea, vomiting, diarrhea, abdominal pain.                                     |
|                      |              | HBV      | Human PKR     | 21553812 |                                                                                 |
|                      |              | HIV-1    | Human PKR     | 25303025 |                                                                                 |
|                      |              | RV       | Human PKR     | 23926336 |                                                                                 |
|                      |              | JEV      | Human PKR     | 24456815 |                                                                                 |
|                      |              | MERS-CoV | Human PKR     | 27095301 |                                                                                 |
|                      |              | NoV      | Human PKR     | 21839773 |                                                                                 |
|                      |              | RuV      | Human PKR     | 28974385 |                                                                                 |
|                      |              | ZIKV     | Human PKR     | 28685770 |                                                                                 |
| Ofloxacin            | Experimental | BKV      | Human TOP2A   | 25399012 | Diarrhea, seizures, insomnia, fainting, allergic reactions.                     |
| Olmesartan medoxomil | Experimental | HEV-B    | Human AGTR1   | 16336207 | Headache, runny nose, sore throat, sneezing, difficulty with breathing.         |
| Omeprazole           | Experimental | EBOV     | Human ATP4A   | 26069727 | Headache, stomach pain, diarrhea, vomiting, gas, cold symptoms.                 |
|                      |              | FLUAV    | Human ATP4A   | 26069727 |                                                                                 |
|                      |              | MARV     | Human ATP4A   | 26069727 |                                                                                 |
| Oritavancin          | Experimental | EBOV     | Human CYP3A4  | 26953343 | Nausea, vomiting, rash, anemia, arthralgia, hypoglycemia.                       |
|                      |              | MERS-CoV | Human CYP3A4  | 26953343 |                                                                                 |
|                      |              | SARS-CoV | Human CYP3A4  | 26953343 |                                                                                 |
| Orlistat             | Experimental | DENV     | Human PNLIP   | 28193229 | Nausea, vomiting, liver toxicity, nephrotoxicity, allergic reactions.           |
|                      |              | HEV-B    | Human PNLIP   | 25680890 |                                                                                 |
| Palbociclib          | Experimental | HIV-1    | Human CDK4    | 25036183 | Nausea, vomiting, peripheral neuropathy.                                        |
|                      |              | HSV-1    | Human CDK4    | 26542306 |                                                                                 |
| Palonosetron         | Experimental | ZIKV     | Human HTR3A   | 27476412 | Headache, diarrhea, constipation, hallucinations, confusion.                    |

|                      |              |          |                   |          |                                                                                                  |
|----------------------|--------------|----------|-------------------|----------|--------------------------------------------------------------------------------------------------|
| Pamidronate          | Experimental | FLUAV    | Human FDPS        | 26285203 | Infusion site reactions, myalgia, headache, nausea, vomiting.                                    |
| Panretin             | Experimental | HHV-8    | Human RARA        | 17374335 | Rash, itching, skin inflammation, pain.                                                          |
| Paroxetine mesylate  | Experimental | HIV-1    | Human SLC6A4      | 10773489 | Nausea, drowsiness, dizziness, insomnia, blurred vision, sweating.                               |
| Pentosan polysulfate | Experimental | HEV-A    | Human FGF2        | 22771616 | Nose bleed, blood in urine and stool, headache, diarrhea, hair loss, rash.                       |
|                      |              | HEV-B    | Human FGF2        | 12941917 |                                                                                                  |
|                      |              | HHV-7    | Human FGF2        | 10480261 |                                                                                                  |
|                      |              | HIV-1    | Human FGF2        | 7683745  |                                                                                                  |
|                      |              | FLUAV    | Human FGF2        | 22197247 |                                                                                                  |
| Pentoxifylline       | Experimental | HIV-1    | Human PDE4B       | 19355959 | Gas, vomiting, diarrhea, blurred vision, headache, dizziness.                                    |
|                      |              | JEV      | Human PDE4B       | 18804347 |                                                                                                  |
| Pioglitazone         | Experimental | HCV      | Human PPARG       | 22412837 | Stomach pain, blood in urine, weight gain, chest pain.                                           |
| Pirlindole           | Experimental | HEV-A    | HEV-A helicase    | 26856848 | Agitation, tremor, hyperthermia, seizures.                                                       |
|                      |              | HEV-B    | HEV-B helicase    | 26856848 |                                                                                                  |
|                      |              | HEV-D    | HEV-D helicase    | 26856848 |                                                                                                  |
| Pitavastatin         | Experimental | HCV      | Human HMGCR       | 17928739 | Memory problems, myalgia, fever, liver toxicity.                                                 |
|                      |              | FLUAV    | Human HMGCR       | 23420457 |                                                                                                  |
| Plerixafor           | Experimental | HIV-1    | Human CXCR4       | 25888743 | Bleedings, gastrointestinal symptoms, insomnia, arthralgia, myalgia, headache.                   |
|                      |              | HIV-2    | Human CXCR4       | 7562918  |                                                                                                  |
| Podofilox            | Experimental | CMV      | Human TOP2A       | 27783035 | Skin irritation, bleeding, insomnia, nausea, vomiting, pain during sex.                          |
| Posaconazole         | Experimental | EBOV     | Human ERG11       | 27890675 | Gastrointestinal toxicity, insomnia, headache, dizziness.                                        |
| Pravastatin          | Experimental | CMV      | Human HMGCR       | 24976258 | Headache, heartburn, memory loss, muscle pain, confusion.                                        |
|                      |              | DENV     | Human HMGCR       | 27431377 |                                                                                                  |
| Prochlorperazine     | Experimental | DENV     | Human DRD2        | 25028694 | Drowsiness, anxiety, missed menstrual period, constipation, weight gain.                         |
| Pseudoephedrine      | Experimental | RSV      | Human SLC6A2      | 2557947  | Anxiety, dizziness, bleedings, arrhythmia.                                                       |
| Pyrimethamine        | Experimental | ZIKV     | Human DHFR        | 27476412 | Sore throat, rash, flu-like syndrome, blood in urine.                                            |
| Raloxifene           | Experimental | FLUAV    | Human ESR1        | 26684252 | Numbness, headache, swelling of hands and legs, vaginal bleeding, flu symptoms.                  |
| Ranitidine           | Experimental | HIV-1    | Human HRH2        | 8950301  | Headache, insomnia, gastrointestinal toxicity, swollen breasts in men.                           |
| Rapamycin            | Experimental | BKV      | Human MTOR        | 21079551 | Gastrointestinal toxicity, anemia, arthralgia, thrombocytopenia.                                 |
|                      |              | HIV-1    | Human MTOR        | 26170311 |                                                                                                  |
| Retinoic acid        | Experimental | HEV-A    | Human RARA        | 24495389 | Back pain, allergic reaction, insomnia, drowsiness, abdominal pain.                              |
| Ribavirin            | Experimental | LASV     | LASV RNA pol      | 28916737 | Heamolytic anemia, worsening of heart disease, teratogenic effect, vision changes, pancreatitis. |
| Ritonavir            | Experimental | MERS-CoV | MERS-CoV protease | 26198719 | Nausea, diarrhea, vomiting, headache, dizziness.                                                 |
| Roflumilast          | Experimental | RSV      | Human PDE4D       | 23936072 | Allergic reactions, weight loss, tremor, diarrhea, flu symptoms.                                 |
| Romidepsin           | Experimental | HIV-1    | Human HDAC1       | 25896701 | Nausea, vomiting, hyperglycemia, diarrhea, infection.                                            |

|               |              |          |                 |          |                                                                                                         |
|---------------|--------------|----------|-----------------|----------|---------------------------------------------------------------------------------------------------------|
| Rosiglitazone | Experimental | DENV     | Human PPARG     | 28384260 | Fluid retention, swelling, chest pain, bleedings, blurred vision.                                       |
| Salmeterol    | Experimental | DENV     | Human LABA      | 27572397 | Headache, nausea, insomnia, vomiting, sweating.                                                         |
| Sertraline    | Experimental | ZIKV     | Human SLC6A4    | 27476412 | Drowsiness, constipation, insomnia, nausea.                                                             |
| Simvastatin   | Experimental | CMV      | Human HMGCR     | 24976258 | Worsening of diabetes, rhabdomyolysis, autoimmune myopathy, nephrotoxicity.                             |
|               |              | DENV     | Human HMGCR     | 27431377 |                                                                                                         |
|               |              | HBV      | Human HMGCR     | 27779671 |                                                                                                         |
|               |              | FLUAV    | Human HMGCR     | 25882623 |                                                                                                         |
|               |              | PV       | Human HMGCR     | 16824485 |                                                                                                         |
| Sitagliptin   | Experimental | HCV      | Human DPP4      | 25308370 | Runny nose, headache, diarrhea, constipation.                                                           |
| Sofosbuvir    | Experimental | ZIKV     | ZIKV pol        | 29352135 | Nausea, diarrhea, rash, allergic reactions, drowsiness.                                                 |
| Sorafenib     | Experimental | BKV      | Human BRAF      | 21088155 | Rash, diarrhea, hand-foot syndrome, hypertension, hair loss.                                            |
|               |              | HCV      | Human BRAF      | 25823619 |                                                                                                         |
| Sulfasalazine | Experimental | HIV-1    | HIV-1 integrase | 9021196  | Nausea, rash, vomiting, liver toxicity.                                                                 |
| Sunitinib     | Experimental | BKV      | Human PDGFRB    | 21088155 | Diarrhea, nausea, anemia, leukopenia, vomiting, bleeding.                                               |
|               |              | DENV     | Human PDGFRB    | 28240606 |                                                                                                         |
|               |              | HCV      | Human PDGFRB    | 28240606 |                                                                                                         |
| Tamoxifen     | Experimental | HCV      | Human ESR1      | 17704057 | Chills, confusion, blurred vision, dizziness, arrhythmia.                                               |
|               |              | HSV-1    | Human ESR1      | 24657267 |                                                                                                         |
| Tardiferon    | Experimental | HIV-1    | Unknown         | 19355959 | Constipation, diarrhea, nausea, vomiting.                                                               |
| Teicoplanin   | Experimental | EBOV     | Human CYP3A4    | 26953343 | Fever, rash, itching, dizziness, headache, diarrhea.                                                    |
|               |              | MERS-CoV | Human CYP3A4    | 26953343 |                                                                                                         |
|               |              | SARS-CoV | Human CYP3A4    | 26953343 |                                                                                                         |
| Telavancin    | Experimental | EBOV     | Human CYP3A4    | 26953343 | Diarrhea, drowsiness, fluid retention, confusion.                                                       |
|               |              | MERS-CoV | Human CYP3A4    | 26953343 |                                                                                                         |
|               |              | SARS-CoV | Human CYP3A4    | 26953343 |                                                                                                         |
| Temsirolimus  | Experimental | ANDV     | Human MTOR      | 23135723 | Rash, nausea, mouth sores, fluid retention.                                                             |
| Terbinafine   | Experimental | HBV      | Human SQLE      | 26456011 | Gastrointestinal symptoms, rash, headache, dizziness.                                                   |
| Teriflunomide | Experimental | EBV      | Human DHODH     | 28574826 | Liver toxicity, diarrhea, flu symptoms.                                                                 |
| Thalidomide   | Experimental | HCV      | Human TNF       | 20303772 | Flu symptoms, rash, convulsions, anxiety, tremor, insomnia.                                             |
| Tiotropium    | Experimental | HRV-B    | Human CHRM3     | 22362848 | Gastrointestinal toxicity, cold symptoms, nose bleed.                                                   |
|               |              | RSV      | Human CHRM3     | 18728351 |                                                                                                         |
| Tofacitinib   | Experimental | HIV-1    | Human JAK1      | 24419350 | Cellulitis, pneumonia, liver toxicity, anemia.                                                          |
| Tolcapone     | Experimental | EBOV     | Human COMT      | 28152588 | Gastrointestinal toxicity, unintentional movements, sleeping problems, mental/mood changes, arrhythmia. |
| Topotecan     | Experimental | DENV     | Human TOP1      | 24727241 | Flu-like syndrome, constipation, bleeding gums, blood in urine, ulcers in the mouth.                    |
|               |              | EBOV     | Human TOP1      | 27127234 |                                                                                                         |

|                |              |       |                |             |                                                                                 |
|----------------|--------------|-------|----------------|-------------|---------------------------------------------------------------------------------|
|                |              | HCV   | Human TOP1     | 23529728    |                                                                                 |
|                |              | HIV-1 | Human TOP1     | 9145855     |                                                                                 |
|                |              | FLUAV | Human TOP1     | 27127234    |                                                                                 |
|                |              | JCV   | Human TOP1     | 26935240    |                                                                                 |
| Toremifene     | Experimental | EBOV  | Human ESR1     | 23785035    | Nausea, sweating, constipation, itching, hair loss, depression.                 |
| Tretinoin      | Experimental | HHV-8 | Human RARA     | 18505171    | Skin, itching, redness, burning, worsening of acne.                             |
| Valproic acid  | Experimental | WNV   | Human ABAT     | 21106740    | Gastrointestinal toxicity, drowsiness, flu-like syndrome, depression, insomnia. |
| Valsartan      | Experimental | HEV-B | Human AGTR1    | 20392896    | Headache, gastrointestinal symptoms, flu symptoms.                              |
| Vemurafenib    | Experimental | HEV-B | Human BRAF     | Unpublished | Headache, skin changes, diarrhea, constipation, hair loss.                      |
|                |              | FLUAV | Human MAPK     | 29312159    |                                                                                 |
| Verapamil      | Experimental | CMV   | Human CACNA1C  | 2819886     | Dizziness, gastrointestinal symptoms, liver toxicity, fainting,                 |
|                |              | EBOV  | Human CACNA1C  | 25722412    |                                                                                 |
|                |              | HRV-A | Human CACNA1C  | 16054245    |                                                                                 |
|                |              | FLUAV | Human CACNA1C  | 6743023     |                                                                                 |
| Xantinol       | Experimental | HIV-1 | Human ADORA1   | 19355959    | Rash, abdominal pain, hypotension, hypoglycemia.                                |
| Zuclopenthixol | Experimental | HEV-B | HEV-B helicase | 26856848    | Headache, fatigue, menstrual problems, anxiety.                                 |

**Table S2.** SaliPhe, SNS-032, obatoclax and gemcitabine differentially affect transcription of immune-related genes in stimulated human PBMC-derived macrophages.

| Drug    | Stimulus | Gene           | FC, log <sub>2</sub> >3, <-3 |
|---------|----------|----------------|------------------------------|
| No_drug | IAV      | <i>IFNB1</i>   | 7,55                         |
|         |          | <i>IFNA14</i>  | 7,39                         |
|         |          | <i>IL29</i>    | 7,32                         |
|         |          | <i>IFNA16</i>  | 7,25                         |
|         |          | <i>IFNA2</i>   | 6,99                         |
|         |          | <i>INDO</i>    | 6,98                         |
|         |          | <i>CXCL10</i>  | 6,93                         |
|         |          | <i>RSAD2</i>   | 6,89                         |
|         |          | <i>CCL8</i>    | 6,81                         |
|         |          | <i>IDO1</i>    | 6,53                         |
|         |          | <i>OASL</i>    | 6,30                         |
|         |          | <i>IFNA8</i>   | 6,27                         |
|         |          | <i>IFNA1</i>   | 6,26                         |
|         |          | <i>TNFSF10</i> | 6,12                         |
|         |          | <i>ISG20</i>   | 6,06                         |
|         |          | <i>IFI44L</i>  | 5,86                         |
|         |          | <i>IFNA7</i>   | 5,86                         |
|         |          | <i>GBP4</i>    | 5,65                         |

|  |                  |      |
|--|------------------|------|
|  | <i>PTGS2</i>     | 5,64 |
|  | <i>TNF</i>       | 5,62 |
|  | <i>CCL20</i>     | 5,54 |
|  | <i>CCL5</i>      | 5,49 |
|  | <i>GBP5</i>      | 5,47 |
|  | <i>MX2</i>       | 5,41 |
|  | <i>CCL4L1</i>    | 5,41 |
|  | <i>IFITM3</i>    | 5,32 |
|  | <i>ISG15</i>     | 5,32 |
|  | <i>IFIT1</i>     | 5,17 |
|  | <i>IFIT3</i>     | 5,16 |
|  | <i>IFIT2</i>     | 4,99 |
|  | <i>USP18</i>     | 4,88 |
|  | <i>HERC5</i>     | 4,77 |
|  | <i>CCL4L2</i>    | 4,70 |
|  | <i>NEXN</i>      | 4,68 |
|  | <i>IRF7</i>      | 4,64 |
|  | <i>TNFAIP6</i>   | 4,63 |
|  | <i>LOC728835</i> | 4,61 |
|  | <i>CCL3L1</i>    | 4,60 |
|  | <i>PRIC285</i>   | 4,56 |
|  | <i>IFNA13</i>    | 4,54 |
|  | <i>OAS2</i>      | 4,51 |
|  | <i>OAS3</i>      | 4,47 |
|  | <i>EPSTI1</i>    | 4,43 |
|  | <i>IFI27</i>     | 4,34 |
|  | <i>GCH1</i>      | 4,33 |
|  | <i>HESX1</i>     | 4,31 |
|  | <i>PMAIP1</i>    | 4,30 |
|  | <i>APOBEC3A</i>  | 4,30 |
|  | <i>IFNW1</i>     | 4,28 |
|  | <i>OAS1</i>      | 4,27 |
|  | <i>DDX58</i>     | 4,25 |
|  | <i>GBP1</i>      | 4,22 |
|  | <i>LOC400759</i> | 4,17 |
|  | <i>MX1</i>       | 4,16 |
|  | <i>IL28B</i>     | 4,15 |
|  | <i>NCF1C</i>     | 4,13 |
|  | <i>IFITM1</i>    | 4,13 |
|  | <i>IL27</i>      | 4,13 |
|  | <i>IFITM2</i>    | 4,09 |
|  | <i>IFNA10</i>    | 4,07 |

|  |                  |      |
|--|------------------|------|
|  | <i>NT5C3</i>     | 4,02 |
|  | <i>ADM</i>       | 4,01 |
|  | <i>SAMD9L</i>    | 3,98 |
|  | <i>AXUD1</i>     | 3,97 |
|  | <i>KLF6</i>      | 3,81 |
|  | <i>DUSP19</i>    | 3,76 |
|  | <i>IL6</i>       | 3,76 |
|  | <i>IL28A</i>     | 3,76 |
|  | <i>C5ORF39</i>   | 3,73 |
|  | <i>IFIH1</i>     | 3,69 |
|  | <i>OTUD1</i>     | 3,68 |
|  | <i>HES4</i>      | 3,68 |
|  | <i>LOC387763</i> | 3,68 |
|  | <i>CCL7</i>      | 3,67 |
|  | <i>CMPK2</i>     | 3,67 |
|  | <i>IL4I1</i>     | 3,65 |
|  | <i>DDX60L</i>    | 3,64 |
|  | <i>GMPR</i>      | 3,60 |
|  | <i>ENPP2</i>     | 3,59 |
|  | <i>LAMP3</i>     | 3,58 |
|  | <i>SAMD9</i>     | 3,54 |
|  | <i>APOL3</i>     | 3,53 |
|  | <i>PDGFRL</i>    | 3,53 |
|  | <i>KIAA1751</i>  | 3,51 |
|  | <i>NCOA7</i>     | 3,51 |
|  | <i>ZC3HAV1</i>   | 3,50 |
|  | <i>CXCL2</i>     | 3,50 |
|  | <i>FAM175A</i>   | 3,46 |
|  | <i>XAF1</i>      | 3,43 |
|  | <i>SP110</i>     | 3,43 |
|  | <i>TNFAIP3</i>   | 3,39 |
|  | <i>IL10RA</i>    | 3,37 |
|  | <i>KIAA1618</i>  | 3,37 |
|  | <i>RTP4</i>      | 3,35 |
|  | <i>NAMPT</i>     | 3,34 |
|  | <i>CD274</i>     | 3,33 |
|  | <i>MXD1</i>      | 3,32 |
|  | <i>PARP9</i>     | 3,32 |
|  | <i>CD69</i>      | 3,32 |
|  | <i>BATF2</i>     | 3,30 |
|  | <i>USP41</i>     | 3,29 |
|  | <i>DDX60</i>     | 3,28 |

|  |       |                     |      |
|--|-------|---------------------|------|
|  |       | <i>STAP1</i>        | 3,28 |
|  |       | <i>FAP</i>          | 3,28 |
|  |       | <i>ZBP1</i>         | 3,25 |
|  |       | <i>HERC6</i>        | 3,25 |
|  |       | <i>CXCL9</i>        | 3,21 |
|  |       | <i>IGF2BP3</i>      | 3,18 |
|  |       | <i>DHX58</i>        | 3,18 |
|  |       | <i>PARP14</i>       | 3,16 |
|  |       | <i>IL12A</i>        | 3,14 |
|  |       | <i>LOC730249</i>    | 3,13 |
|  |       | <i>IFI35</i>        | 3,12 |
|  |       | <i>NCF1</i>         | 3,12 |
|  |       | <i>RABGAP1L</i>     | 3,10 |
|  |       | <i>IFI44</i>        | 3,10 |
|  |       | <i>MAP3K8</i>       | 3,07 |
|  |       | <i>PRDM1</i>        | 3,05 |
|  |       | <i>EDN1</i>         | 3,05 |
|  |       | <i>CH25H</i>        | 3,04 |
|  |       | <i>LOC100128274</i> | 3,01 |
|  |       | <i>MS4A14</i>       | 3,01 |
|  |       | <i>SOCS1</i>        | 3,00 |
|  | dsRNA | <i>CXCL10</i>       | 4,47 |
|  |       | <i>IFIT2</i>        | 3,44 |
|  |       | <i>IFIT1</i>        | 3,39 |
|  |       | <i>MX1</i>          | 3,31 |
|  |       | <i>RSAD2</i>        | 3,20 |
|  |       | <i>GADD45A</i>      | 3,10 |
|  | IFNa  | <i>IFIT1</i>        | 4,40 |
|  |       | <i>IFI44L</i>       | 4,21 |
|  |       | <i>RSAD2</i>        | 4,00 |
|  |       | <i>ISG15</i>        | 3,92 |
|  |       | <i>MX1</i>          | 3,72 |
|  |       | <i>MX2</i>          | 3,68 |
|  |       | <i>EPSTI1</i>       | 3,53 |
|  |       | <i>OAS2</i>         | 3,18 |
|  |       | <i>ISG20</i>        | 3,06 |
|  | LPS   | <i>CXCL10</i>       | 7,14 |
|  |       | <i>IL6</i>          | 7,05 |
|  |       | <i>INDO</i>         | 7,05 |
|  |       | <i>IDO1</i>         | 7,02 |
|  |       | <i>CCL8</i>         | 6,87 |
|  |       | <i>IL1A</i>         | 6,81 |

|  |                  |      |
|--|------------------|------|
|  | <i>CCL20</i>     | 6,80 |
|  | <i>ISG20</i>     | 6,52 |
|  | <i>LOC730249</i> | 6,52 |
|  | <i>PTGS2</i>     | 6,49 |
|  | <i>CCL3L1</i>    | 6,19 |
|  | <i>RSAD2</i>     | 5,95 |
|  | <i>CSF2</i>      | 5,94 |
|  | <i>TNFAIP6</i>   | 5,76 |
|  | <i>IL1B</i>      | 5,69 |
|  | <i>CXCL2</i>     | 5,65 |
|  | <i>TNIP3</i>     | 5,55 |
|  | <i>IRG1</i>      | 5,54 |
|  | <i>IFI44L</i>    | 5,46 |
|  | <i>GBP4</i>      | 5,43 |
|  | <i>CCL1</i>      | 5,39 |
|  | <i>GBP5</i>      | 5,37 |
|  | <i>TNF</i>       | 5,37 |
|  | <i>LOC728835</i> | 5,23 |
|  | <i>CCL4L1</i>    | 5,22 |
|  | <i>IFIT1</i>     | 5,15 |
|  | <i>OASL</i>      | 5,13 |
|  | <i>SLAMF1</i>    | 5,12 |
|  | <i>ISG15</i>     | 5,05 |
|  | <i>LRRC50</i>    | 5,03 |
|  | <i>SERPINB2</i>  | 4,98 |
|  | <i>CXCL1</i>     | 4,97 |
|  | <i>GCH1</i>      | 4,86 |
|  | <i>IL23A</i>     | 4,85 |
|  | <i>EDN1</i>      | 4,84 |
|  | <i>IL7R</i>      | 4,75 |
|  | <i>TNFSF10</i>   | 4,64 |
|  | <i>NCF1C</i>     | 4,61 |
|  | <i>IFIT2</i>     | 4,56 |
|  | <i>CCL5</i>      | 4,54 |
|  | <i>NAMPT</i>     | 4,50 |
|  | <i>CCL4L2</i>    | 4,49 |
|  | <i>EPSTI1</i>    | 4,48 |
|  | <i>GBP1</i>      | 4,48 |
|  | <i>STAT4</i>     | 4,48 |
|  | <i>CD38</i>      | 4,42 |
|  | <i>CFB</i>       | 4,41 |
|  | <i>IFI27</i>     | 4,41 |

|  |                |      |
|--|----------------|------|
|  | <i>ADORA2A</i> | 4,37 |
|  | <i>HES4</i>    | 4,37 |
|  | <i>IL8</i>     | 4,36 |
|  | <i>IFIT3</i>   | 4,36 |
|  | <i>SOD2</i>    | 4,34 |
|  | <i>EBI3</i>    | 4,33 |
|  | <i>IL27</i>    | 4,23 |
|  | <i>ZC3H12A</i> | 4,22 |
|  | <i>NCF1</i>    | 4,22 |
|  | <i>CD80</i>    | 4,21 |
|  | <i>PDE4B</i>   | 4,09 |
|  | <i>IFITM1</i>  | 4,05 |
|  | <i>IER3</i>    | 4,05 |
|  | <i>IRF7</i>    | 4,00 |
|  | <i>BIRC3</i>   | 3,99 |
|  | <i>MX2</i>     | 3,99 |
|  | <i>ADA</i>     | 3,99 |
|  | <i>MARCKS</i>  | 3,96 |
|  | <i>IFITM3</i>  | 3,95 |
|  | <i>CCR7</i>    | 3,93 |
|  | <i>LAMP3</i>   | 3,87 |
|  | <i>CXCL5</i>   | 3,86 |
|  | <i>MAP3K8</i>  | 3,82 |
|  | <i>HERC5</i>   | 3,78 |
|  | <i>USP18</i>   | 3,77 |
|  | <i>RGS16</i>   | 3,73 |
|  | <i>DUSP1</i>   | 3,73 |
|  | <i>MYO1G</i>   | 3,72 |
|  | <i>APOL3</i>   | 3,70 |
|  | <i>MCOLN2</i>  | 3,69 |
|  | <i>CXCL6</i>   | 3,66 |
|  | <i>MX1</i>     | 3,65 |
|  | <i>PRIC285</i> | 3,63 |
|  | <i>CCL7</i>    | 3,61 |
|  | <i>HESX1</i>   | 3,60 |
|  | <i>IL1F9</i>   | 3,59 |
|  | <i>GOS2</i>    | 3,56 |
|  | <i>OSM</i>     | 3,48 |
|  | <i>OAS2</i>    | 3,45 |
|  | <i>CMPK2</i>   | 3,44 |
|  | <i>PDGFRL</i>  | 3,44 |
|  | <i>SGPP2</i>   | 3,36 |

|         |     |                  |       |
|---------|-----|------------------|-------|
|         |     | <i>IRAK2</i>     | 3,34  |
|         |     | <i>NLF2</i>      | 3,34  |
|         |     | <i>SLAMF7</i>    | 3,33  |
|         |     | <i>SLC25A24</i>  | 3,33  |
|         |     | <i>LINCR</i>     | 3,32  |
|         |     | <i>NFKBIZ</i>    | 3,32  |
|         |     | <i>RNF19B</i>    | 3,31  |
|         |     | <i>CCL3</i>      | 3,28  |
|         |     | <i>IGFBP4</i>    | 3,27  |
|         |     | <i>GREM1</i>     | 3,27  |
|         |     | <i>OAS3</i>      | 3,25  |
|         |     | <i>DHX58</i>     | 3,24  |
|         |     | <i>IFI44</i>     | 3,22  |
|         |     | <i>NT5C3</i>     | 3,22  |
|         |     | <i>SERPINE2</i>  | 3,21  |
|         |     | <i>ANGPTL4</i>   | 3,21  |
|         |     | <i>OAS1</i>      | 3,20  |
|         |     | <i>DUSP19</i>    | 3,20  |
|         |     | <i>LOC400759</i> | 3,20  |
|         |     | <i>MIR155HG</i>  | 3,19  |
|         |     | <i>ANKRD22</i>   | 3,19  |
|         |     | <i>IL15RA</i>    | 3,18  |
|         |     | <i>IFITM2</i>    | 3,16  |
|         |     | <i>STAP1</i>     | 3,11  |
|         |     | <i>ADM</i>       | 3,10  |
|         |     | <i>ITGB8</i>     | 3,10  |
|         |     | <i>TRIM22</i>    | 3,08  |
|         |     | <i>IFNG</i>      | 3,08  |
|         |     | <i>IRF1</i>      | 3,06  |
|         |     | <i>EHD1</i>      | 3,06  |
|         |     | <i>C15ORF48</i>  | 3,06  |
|         |     | <i>XAF1</i>      | 3,05  |
|         |     | <i>PFKFB3</i>    | 3,05  |
|         |     | <i>SP110</i>     | 3,05  |
|         |     | <i>CXCL9</i>     | 3,05  |
|         |     | <i>ZP3</i>       | 3,05  |
|         |     | <i>GRAMD1A</i>   | 3,04  |
|         |     | <i>SAMD9</i>     | 3,02  |
| SaliPhe | IAV | <i>PLIN2</i>     | 3,05  |
|         |     | <i>IFNA2</i>     | -6,58 |
|         |     | <i>IFNA14</i>    | -6,44 |
|         |     | <i>IL29</i>      | -6,36 |

|         |         |                     |       |
|---------|---------|---------------------|-------|
|         |         | <i>IFNA16</i>       | -6,03 |
|         |         | <i>IDO1</i>         | -5,61 |
|         |         | <i>INDO</i>         | -5,60 |
|         |         | <i>IFNA7</i>        | -5,54 |
|         |         | <i>IFNA8</i>        | -5,52 |
|         |         | <i>IFNA1</i>        | -5,41 |
|         |         | <i>IFNB1</i>        | -5,34 |
|         |         | <i>PTGS2</i>        | -4,75 |
|         |         | <i>CCL5</i>         | -4,42 |
|         |         | <i>IFNA13</i>       | -4,30 |
|         |         | <i>IFNW1</i>        | -4,22 |
|         |         | <i>IL28B</i>        | -4,10 |
|         |         | <i>CCL20</i>        | -4,08 |
|         |         | <i>IFNA10</i>       | -4,02 |
|         |         | <i>IL28A</i>        | -3,71 |
|         |         | <i>KLF6</i>         | -3,61 |
|         |         | <i>PMAIP1</i>       | -3,45 |
|         |         | <i>IL27</i>         | -3,44 |
|         |         | <i>CCL3L1</i>       | -3,42 |
|         |         | <i>TNF</i>          | -3,42 |
|         |         | <i>CCL4L2</i>       | -3,35 |
|         |         | <i>IFI27</i>        | -3,28 |
|         |         | <i>FAP</i>          | -3,25 |
|         |         | <i>HES4</i>         | -3,24 |
|         |         | <i>GBP5</i>         | -3,20 |
|         |         | <i>ISG20</i>        | -3,18 |
|         |         | <i>FAM175A</i>      | -3,16 |
|         |         | <i>LOC728835</i>    | -3,13 |
|         |         | <i>CXCL9</i>        | -3,10 |
|         |         | <i>ENPP2</i>        | -3,10 |
|         |         | <i>KIAA1751</i>     | -3,09 |
|         |         | <i>MXD1</i>         | -3,08 |
|         |         | <i>NCF1C</i>        | -3,05 |
|         |         | <i>LOC387763</i>    | -3,03 |
|         |         | <i>IL12A</i>        | -3,01 |
|         |         | <i>CCL4L1</i>       | -3,00 |
|         | dsRNA   | <i>GADD45A</i>      | -3,19 |
| SNS-032 | No_stim | <i>C9ORF152</i>     | 3,41  |
|         |         | <i>LOC100132715</i> | -3,97 |
|         |         | <i>HCP5</i>         | -3,89 |
|         |         | <i>EEF1E1</i>       | -3,60 |
|         |         | <i>EXOSC3</i>       | -3,44 |

|  |     |                  |       |
|--|-----|------------------|-------|
|  |     | <i>SLFN11</i>    | -3,33 |
|  |     | <i>GTF2H2B</i>   | -3,30 |
|  |     | <i>DIMT1L</i>    | -3,30 |
|  |     | <i>STS-1</i>     | -3,27 |
|  |     | <i>RGS2</i>      | -3,23 |
|  |     | <i>OBFC2A</i>    | -3,15 |
|  |     | <i>SRP19</i>     | -3,10 |
|  |     | <i>NSMCE4A</i>   | -3,09 |
|  |     | <i>SFRS3</i>     | -3,08 |
|  |     | <i>GPR34</i>     | -3,07 |
|  |     | <i>NFKBIE</i>    | -3,04 |
|  |     | <i>MGAT2</i>     | -3,02 |
|  | IAV | <i>IFNA16</i>    | -7,19 |
|  |     | <i>IFNA14</i>    | -7,16 |
|  |     | <i>IFNA2</i>     | -7,00 |
|  |     | <i>IL29</i>      | -6,95 |
|  |     | <i>CCL4L1</i>    | -6,29 |
|  |     | <i>INDO</i>      | -6,25 |
|  |     | <i>IFNA8</i>     | -6,11 |
|  |     | <i>IFNA7</i>     | -6,11 |
|  |     | <i>LOC728835</i> | -6,02 |
|  |     | <i>IDO1</i>      | -6,00 |
|  |     | <i>PTGS2</i>     | -5,94 |
|  |     | <i>IFNA1</i>     | -5,82 |
|  |     | <i>CCL4L2</i>    | -5,63 |
|  |     | <i>CCL20</i>     | -5,59 |
|  |     | <i>CCL5</i>      | -5,50 |
|  |     | <i>TNF</i>       | -5,46 |
|  |     | <i>TNFAIP6</i>   | -5,25 |
|  |     | <i>IFNB1</i>     | -5,19 |
|  |     | <i>ISG20</i>     | -5,19 |
|  |     | <i>CCL3L1</i>    | -5,07 |
|  |     | <i>CXCL10</i>    | -4,87 |
|  |     | <i>FAM175A</i>   | -4,82 |
|  |     | <i>KIAA1618</i>  | -4,78 |
|  |     | <i>OASL</i>      | -4,75 |
|  |     | <i>OTUD1</i>     | -4,65 |
|  |     | <i>IFNA13</i>    | -4,63 |
|  |     | <i>KIAA1751</i>  | -4,61 |
|  |     | <i>KLF4</i>      | -4,58 |
|  |     | <i>CCL7</i>      | -4,55 |
|  |     | <i>IL411</i>     | -4,44 |

|  |                     |       |
|--|---------------------|-------|
|  | <i>APOBEC3A</i>     | -4,39 |
|  | <i>DDX58</i>        | -4,38 |
|  | <i>IFNW1</i>        | -4,38 |
|  | <i>F3</i>           | -4,36 |
|  | <i>GCH1</i>         | -4,36 |
|  | <i>IL28B</i>        | -4,34 |
|  | <i>ATF5</i>         | -4,33 |
|  | <i>TNFAIP3</i>      | -4,30 |
|  | <i>IFI44L</i>       | -4,29 |
|  | <i>IFI27</i>        | -4,27 |
|  | <i>CH25H</i>        | -4,27 |
|  | <i>HESX1</i>        | -4,26 |
|  | <i>HES4</i>         | -4,15 |
|  | <i>MXD1</i>         | -4,14 |
|  | <i>GBP4</i>         | -4,13 |
|  | <i>RABGAP1L</i>     | -4,10 |
|  | <i>MX2</i>          | -4,09 |
|  | <i>PTGER4</i>       | -4,09 |
|  | <i>PMAIP1</i>       | -4,07 |
|  | <i>LOC100132715</i> | -4,06 |
|  | <i>IL28A</i>        | -4,06 |
|  | <i>MCOLN2</i>       | -4,05 |
|  | <i>IFNA10</i>       | -4,05 |
|  | <i>IL27</i>         | -4,04 |
|  | <i>IL6</i>          | -4,02 |
|  | <i>NCF1C</i>        | -3,99 |
|  | <i>GEM</i>          | -3,99 |
|  | <i>ISCA1</i>        | -3,98 |
|  | <i>EGR1</i>         | -3,98 |
|  | <i>IRF7</i>         | -3,97 |
|  | <i>DDX60L</i>       | -3,96 |
|  | <i>CCL3</i>         | -3,96 |
|  | <i>CCL8</i>         | -3,95 |
|  | <i>STAP1</i>        | -3,95 |
|  | <i>ENPP2</i>        | -3,94 |
|  | <i>RGS1</i>         | -3,94 |
|  | <i>CXCL2</i>        | -3,92 |
|  | <i>RAPGEF2</i>      | -3,92 |
|  | <i>CDKN2AIPNL</i>   | -3,91 |
|  | <i>PLSCR1</i>       | -3,90 |
|  | <i>IER3</i>         | -3,88 |
|  | <i>TRIM5</i>        | -3,88 |

|  |                     |       |
|--|---------------------|-------|
|  | <i>PPM1B</i>        | -3,87 |
|  | <i>PELI1</i>        | -3,87 |
|  | <i>IFITM1</i>       | -3,85 |
|  | <i>PSMB9</i>        | -3,83 |
|  | <i>MIR155HG</i>     | -3,83 |
|  | <i>LOC100129362</i> | -3,83 |
|  | <i>C14ORF85</i>     | -3,81 |
|  | <i>DNAJB1</i>       | -3,81 |
|  | <i>ADM</i>          | -3,81 |
|  | <i>DUSP19</i>       | -3,79 |
|  | <i>IFIT1</i>        | -3,77 |
|  | <i>CASP1</i>        | -3,77 |
|  | <i>PRIC285</i>      | -3,76 |
|  | <i>HCP5</i>         | -3,74 |
|  | <i>MS4A14</i>       | -3,72 |
|  | <i>KLF6</i>         | -3,71 |
|  | <i>LOC387763</i>    | -3,70 |
|  | <i>CCL2</i>         | -3,70 |
|  | <i>CYP27B1</i>      | -3,70 |
|  | <i>GBP5</i>         | -3,69 |
|  | <i>C17ORF87</i>     | -3,68 |
|  | <i>IFI44</i>        | -3,68 |
|  | <i>IL17RD</i>       | -3,68 |
|  | <i>C15ORF57</i>     | -3,67 |
|  | <i>CD40</i>         | -3,66 |
|  | <i>APOL3</i>        | -3,66 |
|  | <i>IL8</i>          | -3,65 |
|  | <i>BTG1</i>         | -3,63 |
|  | <i>GTF2E2</i>       | -3,60 |
|  | <i>CITED2</i>       | -3,58 |
|  | <i>CXCL9</i>        | -3,58 |
|  | <i>IL1B</i>         | -3,56 |
|  | <i>EDN1</i>         | -3,53 |
|  | <i>TNFSF10</i>      | -3,52 |
|  | <i>ASCL2</i>        | -3,52 |
|  | <i>NBN</i>          | -3,51 |
|  | <i>NFKBIE</i>       | -3,51 |
|  | <i>EBI2</i>         | -3,51 |
|  | <i>ERICH1</i>       | -3,50 |
|  | <i>LOC728809</i>    | -3,50 |
|  | <i>MYLIP</i>        | -3,48 |
|  | <i>BRDG1</i>        | -3,48 |

|  |  |                     |       |
|--|--|---------------------|-------|
|  |  | <i>LOC400759</i>    | -3,47 |
|  |  | <i>PSTPIP2</i>      | -3,46 |
|  |  | <i>PNRC2</i>        | -3,45 |
|  |  | <i>GBP3</i>         | -3,43 |
|  |  | <i>ZFP36</i>        | -3,42 |
|  |  | <i>SOCS1</i>        | -3,40 |
|  |  | <i>DDX51</i>        | -3,39 |
|  |  | <i>CCRL2</i>        | -3,39 |
|  |  | <i>XAF1</i>         | -3,39 |
|  |  | <i>HSPA1A</i>       | -3,38 |
|  |  | <i>C5ORF39</i>      | -3,37 |
|  |  | <i>METTL1</i>       | -3,37 |
|  |  | <i>BAMBI</i>        | -3,35 |
|  |  | <i>IGF2BP3</i>      | -3,34 |
|  |  | <i>INTS3</i>        | -3,34 |
|  |  | <i>BMS1P5</i>       | -3,34 |
|  |  | <i>LOC100131261</i> | -3,34 |
|  |  | <i>CCNA1</i>        | -3,32 |
|  |  | <i>NCF1</i>         | -3,32 |
|  |  | <i>SLFN11</i>       | -3,32 |
|  |  | <i>GMPR</i>         | -3,31 |
|  |  | <i>IL12A</i>        | -3,31 |
|  |  | <i>LAMP3</i>        | -3,30 |
|  |  | <i>IFITM3</i>       | -3,30 |
|  |  | <i>OBFC2A</i>       | -3,30 |
|  |  | <i>ZFP36L2</i>      | -3,30 |
|  |  | <i>IFI35</i>        | -3,29 |
|  |  | <i>KCNH6</i>        | -3,29 |
|  |  | <i>PSMD12</i>       | -3,29 |
|  |  | <i>C3AR1</i>        | -3,29 |
|  |  | <i>EID2B</i>        | -3,28 |
|  |  | <i>OAS2</i>         | -3,27 |
|  |  | <i>IL10RA</i>       | -3,25 |
|  |  | <i>LOC730249</i>    | -3,25 |
|  |  | <i>WSB1</i>         | -3,24 |
|  |  | <i>FAM26F</i>       | -3,24 |
|  |  | <i>SAMD9</i>        | -3,23 |
|  |  | <i>CFLAR</i>        | -3,23 |
|  |  | <i>TTC39B</i>       | -3,22 |
|  |  | <i>DHX58</i>        | -3,22 |
|  |  | <i>CD80</i>         | -3,22 |
|  |  | <i>EXOSC3</i>       | -3,22 |

|  |                     |       |
|--|---------------------|-------|
|  | <i>GK</i>           | -3,22 |
|  | <i>SLAMF7</i>       | -3,21 |
|  | <i>NAGK</i>         | -3,20 |
|  | <i>GBP1</i>         | -3,19 |
|  | <i>PI4K2B</i>       | -3,19 |
|  | <i>LOC100130516</i> | -3,19 |
|  | <i>PARP10</i>       | -3,19 |
|  | <i>MARCKS</i>       | -3,18 |
|  | <i>JUN</i>          | -3,18 |
|  | <i>LOC728620</i>    | -3,17 |
|  | <i>SMARCA5</i>      | -3,17 |
|  | <i>PTPN6</i>        | -3,17 |
|  | <i>GCLC</i>         | -3,16 |
|  | <i>TRIP4</i>        | -3,16 |
|  | <i>LOC100128084</i> | -3,16 |
|  | <i>TRIM22</i>       | -3,16 |
|  | <i>LOC100132391</i> | -3,16 |
|  | <i>NT5C3</i>        | -3,15 |
|  | <i>PPP1R15A</i>     | -3,15 |
|  | <i>NFKBIA</i>       | -3,15 |
|  | <i>XRN1</i>         | -3,15 |
|  | <i>APOBEC3G</i>     | -3,15 |
|  | <i>HS.489254</i>    | -3,15 |
|  | <i>VAMP5</i>        | -3,14 |
|  | <i>HPS5</i>         | -3,14 |
|  | <i>LOC389293</i>    | -3,14 |
|  | <i>ZBP1</i>         | -3,13 |
|  | <i>TIA1</i>         | -3,13 |
|  | <i>DDX60</i>        | -3,12 |
|  | <i>MGAT2</i>        | -3,12 |
|  | <i>GPR180</i>       | -3,10 |
|  | <i>RPAP3</i>        | -3,10 |
|  | <i>MRPL17</i>       | -3,09 |
|  | <i>HSPA1B</i>       | -3,09 |
|  | <i>MLKL</i>         | -3,09 |
|  | <i>FGD2</i>         | -3,09 |
|  | <i>HS.133181</i>    | -3,09 |
|  | <i>HERC4</i>        | -3,08 |
|  | <i>JAK2</i>         | -3,07 |
|  | <i>OAS1</i>         | -3,07 |
|  | <i>NR4A2</i>        | -3,07 |
|  | <i>CATSPER2</i>     | -3,07 |

|           |     |                  |       |
|-----------|-----|------------------|-------|
|           |     | <i>GPR84</i>     | -3,07 |
|           |     | <i>RANBP3L</i>   | -3,06 |
|           |     | <i>LOC729603</i> | -3,06 |
|           |     | <i>TRIM13</i>    | -3,06 |
|           |     | <i>IL7R</i>      | -3,05 |
|           |     | <i>NFKBIZ</i>    | -3,05 |
|           |     | <i>CCL13</i>     | -3,05 |
|           |     | <i>NSMCE4A</i>   | -3,05 |
|           |     | <i>EXOSC9</i>    | -3,04 |
|           |     | <i>PHF11</i>     | -3,02 |
|           |     | <i>XBP1</i>      | -3,01 |
|           |     | <i>RCAN1</i>     | -3,01 |
|           |     | <i>ZC3H12A</i>   | -3,01 |
|           |     | <i>HNRNPD</i>    | -3,01 |
|           |     | <i>ISCA1L</i>    | -3,01 |
|           |     | <i>FUT4</i>      | -3,00 |
|           |     | <i>GDF15</i>     | 4,06  |
|           |     | <i>TP53BP2</i>   | 3,06  |
|           |     | <i>TRIM16L</i>   | 3,04  |
|           |     | <i>AFMID</i>     | 3,03  |
|           | LPS | <i>LOC730249</i> | -4,85 |
|           |     | <i>IRG1</i>      | -4,64 |
|           |     | <i>RGS16</i>     | -3,84 |
|           |     | <i>CXCL6</i>     | -3,56 |
|           |     | <i>OSM</i>       | -3,41 |
|           |     | <i>CFB</i>       | -3,35 |
|           |     | <i>TM4SF1</i>    | -3,20 |
|           |     | <i>CXCL5</i>     | -3,17 |
|           |     | <i>CCL1</i>      | -3,17 |
|           |     | <i>GREM1</i>     | -3,14 |
|           |     | <i>ANGPTL4</i>   | -3,13 |
|           |     | <i>NCF1C</i>     | -3,12 |
|           |     | <i>NLF2</i>      | -3,08 |
| Obatoclax | IAV | <i>AKR1C3</i>    | 3,21  |
|           |     | <i>IFNB1</i>     | -7,58 |
|           |     | <i>IFNA14</i>    | -7,49 |
|           |     | <i>IL29</i>      | -7,40 |
|           |     | <i>IFNA16</i>    | -7,24 |
|           |     | <i>CCL8</i>      | -7,18 |
|           |     | <i>RSAD2</i>     | -7,00 |
|           |     | <i>IFNA2</i>     | -6,97 |
|           |     | <i>INDO</i>      | -6,92 |

|  |                  |       |
|--|------------------|-------|
|  | <i>CXCL10</i>    | -6,80 |
|  | <i>IDO1</i>      | -6,58 |
|  | <i>IFNA1</i>     | -6,32 |
|  | <i>TNFSF10</i>   | -6,28 |
|  | <i>IFNA8</i>     | -6,27 |
|  | <i>OASL</i>      | -6,12 |
|  | <i>ISG20</i>     | -6,04 |
|  | <i>IFNA7</i>     | -5,93 |
|  | <i>IFI44L</i>    | -5,68 |
|  | <i>ISG15</i>     | -5,51 |
|  | <i>PTGS2</i>     | -5,43 |
|  | <i>GBP5</i>      | -5,38 |
|  | <i>USP18</i>     | -5,22 |
|  | <i>TNF</i>       | -5,22 |
|  | <i>IFIT3</i>     | -5,21 |
|  | <i>IFITM3</i>    | -5,21 |
|  | <i>MX2</i>       | -5,05 |
|  | <i>CCL20</i>     | -5,01 |
|  | <i>IFIT1</i>     | -4,95 |
|  | <i>CCL5</i>      | -4,94 |
|  | <i>GBP4</i>      | -4,92 |
|  | <i>GBP1</i>      | -4,84 |
|  | <i>NEXN</i>      | -4,77 |
|  | <i>IFIT2</i>     | -4,72 |
|  | <i>IFNA13</i>    | -4,70 |
|  | <i>DUSP19</i>    | -4,59 |
|  | <i>HESX1</i>     | -4,59 |
|  | <i>PMAIP1</i>    | -4,58 |
|  | <i>LOC400759</i> | -4,52 |
|  | <i>IFI27</i>     | -4,48 |
|  | <i>CCL7</i>      | -4,44 |
|  | <i>NT5C3</i>     | -4,38 |
|  | <i>APOBEC3A</i>  | -4,32 |
|  | <i>IFNW1</i>     | -4,27 |
|  | <i>FAM175A</i>   | -4,25 |
|  | <i>KIAA1751</i>  | -4,22 |
|  | <i>IFITM1</i>    | -4,17 |
|  | <i>CCL3L1</i>    | -4,15 |
|  | <i>DDX58</i>     | -4,13 |
|  | <i>IL6</i>       | -4,12 |
|  | <i>IL28B</i>     | -4,11 |
|  | <i>IFNA10</i>    | -4,09 |

|  |                  |       |
|--|------------------|-------|
|  | <i>GCH1</i>      | -4,09 |
|  | <i>OAS3</i>      | -4,08 |
|  | <i>ENPP2</i>     | -4,06 |
|  | <i>C5ORF39</i>   | -4,02 |
|  | <i>PRIC285</i>   | -4,00 |
|  | <i>IL27</i>      | -3,99 |
|  | <i>HES4</i>      | -3,99 |
|  | <i>IRF7</i>      | -3,97 |
|  | <i>IL28A</i>     | -3,93 |
|  | <i>EPSTI1</i>    | -3,90 |
|  | <i>HERC5</i>     | -3,90 |
|  | <i>OAS1</i>      | -3,85 |
|  | <i>IFI44</i>     | -3,84 |
|  | <i>KLF6</i>      | -3,84 |
|  | <i>IFITM2</i>    | -3,79 |
|  | <i>NCF1C</i>     | -3,77 |
|  | <i>CCL4L2</i>    | -3,76 |
|  | <i>CD69</i>      | -3,72 |
|  | <i>CMPK2</i>     | -3,72 |
|  | <i>KIAA1618</i>  | -3,69 |
|  | <i>PDGFRL</i>    | -3,65 |
|  | <i>LOC728835</i> | -3,61 |
|  | <i>GMPR</i>      | -3,59 |
|  | <i>MXD1</i>      | -3,58 |
|  | <i>OAS2</i>      | -3,57 |
|  | <i>LOC387763</i> | -3,55 |
|  | <i>ADM</i>       | -3,54 |
|  | <i>CCL4L1</i>    | -3,53 |
|  | <i>CCL2</i>      | -3,53 |
|  | <i>XAF1</i>      | -3,53 |
|  | <i>USP41</i>     | -3,52 |
|  | <i>STAP1</i>     | -3,52 |
|  | <i>SAMD9L</i>    | -3,47 |
|  | <i>SP110</i>     | -3,45 |
|  | <i>CXCL9</i>     | -3,37 |
|  | <i>FAP</i>       | -3,36 |
|  | <i>CH25H</i>     | -3,36 |
|  | <i>DDX60L</i>    | -3,34 |
|  | <i>VAMP5</i>     | -3,29 |
|  | <i>NCOA7</i>     | -3,27 |
|  | <i>BRDG1</i>     | -3,27 |
|  | <i>ZC3HAV1</i>   | -3,27 |

|  |       |                     |       |
|--|-------|---------------------|-------|
|  |       | <i>LOC100128274</i> | -3,25 |
|  |       | <i>RPPH1</i>        | -3,23 |
|  |       | <i>BATF2</i>        | -3,22 |
|  |       | <i>ZBP1</i>         | -3,21 |
|  |       | <i>IL12A</i>        | -3,21 |
|  |       | <i>IFI35</i>        | -3,20 |
|  |       | <i>AXUD1</i>        | -3,18 |
|  |       | <i>IL10RA</i>       | -3,17 |
|  |       | <i>HERC6</i>        | -3,15 |
|  |       | <i>RTP4</i>         | -3,15 |
|  |       | <i>SDS</i>          | -3,12 |
|  |       | <i>SAMD9</i>        | -3,09 |
|  |       | <i>IFNG</i>         | -3,07 |
|  |       | <i>CXCL2</i>        | -3,07 |
|  |       | <i>LOC730249</i>    | -3,07 |
|  |       | <i>IFIH1</i>        | -3,06 |
|  |       | <i>TNFAIP6</i>      | -3,04 |
|  |       | <i>SLC25A28</i>     | -3,04 |
|  |       | <i>IL1RN</i>        | -3,03 |
|  | dsRNA | <i>CXCL10</i>       | -4,82 |
|  |       | <i>DUSP1</i>        | -4,20 |
|  |       | <i>NFKBIE</i>       | -4,19 |
|  |       | <i>PLAU</i>         | -4,18 |
|  |       | <i>IFIT1</i>        | -4,06 |
|  |       | <i>IFIT3</i>        | -3,97 |
|  |       | <i>CEBPA</i>        | -3,95 |
|  |       | <i>HPS6</i>         | -3,83 |
|  |       | <i>IMP3</i>         | -3,82 |
|  |       | <i>CCL3L1</i>       | -3,82 |
|  |       | <i>CCRL2</i>        | -3,74 |
|  |       | <i>CEBPZ</i>        | -3,74 |
|  |       | <i>PNRC2</i>        | -3,74 |
|  |       | <i>BTG2</i>         | -3,72 |
|  |       | <i>MAFB</i>         | -3,68 |
|  |       | <i>IL8</i>          | -3,65 |
|  |       | <i>ANKRD57</i>      | -3,57 |
|  |       | <i>BTG1</i>         | -3,56 |
|  |       | <i>TNFSF14</i>      | -3,56 |
|  |       | <i>CCL3</i>         | -3,55 |
|  |       | <i>HSPA1B</i>       | -3,54 |
|  |       | <i>TNFRSF1A</i>     | -3,52 |
|  |       | <i>ZBED5</i>        | -3,51 |

|  |  |                     |       |
|--|--|---------------------|-------|
|  |  | <i>LOC100131261</i> | -3,50 |
|  |  | <i>XBP1</i>         | -3,47 |
|  |  | <i>LOC728835</i>    | -3,46 |
|  |  | <i>OKL38</i>        | -3,44 |
|  |  | <i>SLC38A2</i>      | -3,44 |
|  |  | <i>CCL3L3</i>       | -3,44 |
|  |  | <i>RGS2</i>         | -3,39 |
|  |  | <i>SERTAD1</i>      | -3,39 |
|  |  | <i>FRAT2</i>        | -3,35 |
|  |  | <i>RSAD2</i>        | -3,32 |
|  |  | <i>GEM</i>          | -3,30 |
|  |  | <i>RG9MTD1</i>      | -3,29 |
|  |  | <i>C9ORF167</i>     | -3,28 |
|  |  | <i>MX1</i>          | -3,28 |
|  |  | <i>HERPUD1</i>      | -3,28 |
|  |  | <i>C14ORF169</i>    | -3,26 |
|  |  | <i>ADM</i>          | -3,25 |
|  |  | <i>TRIB1</i>        | -3,25 |
|  |  | <i>MGAT2</i>        | -3,24 |
|  |  | <i>EXOSC3</i>       | -3,24 |
|  |  | <i>ATF3</i>         | -3,23 |
|  |  | <i>TSC22D1</i>      | -3,19 |
|  |  | <i>PLIN2</i>        | -3,19 |
|  |  | <i>HCP5</i>         | -3,18 |
|  |  | <i>TNF</i>          | -3,17 |
|  |  | <i>IL1B</i>         | -3,17 |
|  |  | <i>LOC100132715</i> | -3,17 |
|  |  | <i>TTC4</i>         | -3,15 |
|  |  | <i>SLFN11</i>       | -3,14 |
|  |  | <i>OBFC2A</i>       | -3,14 |
|  |  | <i>PRIC285</i>      | -3,13 |
|  |  | <i>HMGCS1</i>       | -3,12 |
|  |  | <i>LOC728006</i>    | -3,11 |
|  |  | <i>IFIT2</i>        | -3,11 |
|  |  | <i>CCL4L2</i>       | -3,10 |
|  |  | <i>FADD</i>         | -3,10 |
|  |  | <i>IRF9</i>         | -3,09 |
|  |  | <i>DNAJB9</i>       | -3,09 |
|  |  | <i>SPRED1</i>       | -3,07 |
|  |  | <i>HSPA1A</i>       | -3,07 |
|  |  | <i>BAZ1A</i>        | -3,07 |
|  |  | <i>DUSP5</i>        | -3,07 |

|             |       |                  |       |
|-------------|-------|------------------|-------|
|             |       | <i>CCL8</i>      | -3,06 |
|             |       | <i>CCDC117</i>   | -3,04 |
| Gemcitabine | IAV   | <i>IFNE</i>      | 4,47  |
|             |       | <i>IFNE1</i>     | 3,43  |
|             | dsRNA | <i>CCL3</i>      | -3,41 |
|             |       | <i>CCL3L1</i>    | -3,36 |
|             |       | <i>LOC728835</i> | -3,25 |

**Table S3.** SaliPhe, SNS-032, obatoclax and gemcitabine differentially affect production of cytokines and growth factors by stimulated human PBMC-derived macrophages.

| <b>Drug</b> | <b>Stimulus</b> | <b>Protein</b> | <b>Up=1/Down=-1</b> |
|-------------|-----------------|----------------|---------------------|
| No_drug     | IAV             | CCL2           | 1                   |
|             |                 | CFD            | 1                   |
|             |                 | Angiogenin     | 1                   |
|             |                 | PTX3           | 1                   |
|             |                 | CCL7           | 1                   |
|             |                 | IFNG           | 1                   |
|             |                 | CRP            | 1                   |
|             |                 | Ang-1          | 1                   |
|             |                 | MIF            | 1                   |
|             |                 | CXCL10         | 1                   |
|             |                 | IL-1ra         | 1                   |
|             |                 | CSF2           | 1                   |
|             | dsRNA           | ApoA1          | -1                  |
|             |                 | CXCL4          | -1                  |
|             |                 | BDNF           | -1                  |
|             | IFNa            | ApoA1          | -1                  |
|             |                 | CXCL4          | -1                  |
|             |                 | BDNF           | -1                  |
|             | LPS             | CXCL1          | 1                   |
|             |                 | IL-6           | 1                   |
|             |                 | CCL2           | 1                   |
|             |                 | PTX3           | 1                   |
|             |                 | IFNG           | 1                   |
|             |                 | CRP            | 1                   |
|             |                 | Ang-1          | 1                   |
|             |                 | IL-1a          | 1                   |
|             |                 | TNF-a          | 1                   |
|             |                 | CCL3/CCL4      | 1                   |
|             |                 | IL-1ra         | 1                   |
|             |                 | CSF2           | 1                   |

|         |      |            |    |
|---------|------|------------|----|
|         |      | CD147      | 1  |
| SaliPhe | IAV  | VDBP       | -1 |
|         |      | ApoA1      | -1 |
|         |      | CCL2       | -1 |
|         |      | CFD        | -1 |
|         |      | Angiogenin | -1 |
|         |      | PTX3       | -1 |
|         |      | CCL7       | -1 |
|         |      | IFNG       | -1 |
|         |      | CRP        | -1 |
|         |      | Ang-1      | -1 |
|         |      | MIF        | -1 |
|         |      | CXCL10     | -1 |
|         |      | IL-1ra     | -1 |
|         |      | CSF2       | -1 |
|         | IFNa | LCN2       | 1  |
|         |      | PDGF-AA    | 1  |
|         |      | CCL2       | 1  |
|         |      | CD31       | 1  |
|         |      | EGF        | 1  |
|         |      | uPAR       | 1  |
| SNS-032 | IAV  | CXCL5      | -1 |
|         |      | ApoA1      | -1 |
|         |      | CHI3L1     | -1 |
|         |      | VDBP       | -1 |
|         |      | LCN2       | -1 |
|         |      | PDGF-AA    | -1 |
|         |      | CCL2       | -1 |
|         |      | CFD        | -1 |
|         |      | Angiogenin | -1 |
|         |      | CD31       | -1 |
|         |      | PTX3       | -1 |
|         |      | CCL7       | -1 |
|         |      | IFNG       | -1 |
|         |      | CRP        | -1 |
|         |      | Ang-1      | -1 |
|         |      | CXCL4      | -1 |
|         |      | MIF        | -1 |
|         |      | BDNF       | -1 |
|         |      | CCL5       | -1 |
|         |      | TSP-1      | -1 |
|         |      | RBP-4      | -1 |

|           |         |           |    |
|-----------|---------|-----------|----|
|           |         | CXCL10    | -1 |
|           |         | IL-1ra    | -1 |
|           |         | EGF       | -1 |
|           |         | uPAR      | -1 |
|           |         | CD147     | -1 |
|           |         | MMP-9     | -1 |
|           | dsRNA   | CXCL5     | -1 |
|           |         | OPN       | -1 |
|           |         | LCN2      | 1  |
|           | IFNa    | CXCL5     | -1 |
|           |         | OPN       | -1 |
|           |         | EGF       | 1  |
|           | LPS     | CXCL1     | -1 |
|           |         | CXCL5     | -1 |
|           |         | OPN       | -1 |
|           |         | ApoA1     | -1 |
|           |         | IL-6      | -1 |
|           |         | LCN2      | -1 |
|           |         | VDBP      | -1 |
|           |         | CD31      | -1 |
|           |         | CCL2      | -1 |
|           |         | PTX3      | -1 |
|           |         | IFNG      | -1 |
|           |         | CRP       | -1 |
|           |         | Ang-1     | -1 |
|           |         | IL-1ra    | -1 |
|           |         | BDNF      | -1 |
|           |         | TNF-a     | -1 |
|           |         | CCL3/CCL4 | -1 |
|           |         | RBP-4     | -1 |
|           |         | EGF       | -1 |
|           |         | IL-1ra    | -1 |
|           |         | uPAR      | -1 |
|           |         | CSF2      | -1 |
|           |         | CD147     | -1 |
| Obatoclax | No_stim | CXCL5     | -1 |
|           |         | CHI3L1    | 1  |
|           |         | LCN2      | 1  |
|           |         | CCL2      | 1  |
|           |         | CCL3/CCL4 | 1  |
|           |         | RETN      | 1  |
|           | IAV     | CXCL5     | -1 |

|  |       |            |    |
|--|-------|------------|----|
|  |       | ApoA1      | -1 |
|  |       | LCN2       | -1 |
|  |       | PDGF-AA    | -1 |
|  |       | VDBP       | -1 |
|  |       | Angiogenin | -1 |
|  |       | CFD        | -1 |
|  |       | CCL2       | -1 |
|  |       | CD31       | -1 |
|  |       | PTX3       | -1 |
|  |       | CCL7       | -1 |
|  |       | IFNG       | -1 |
|  |       | CRP        | -1 |
|  |       | Ang-1      | -1 |
|  |       | CXCL4      | -1 |
|  |       | MIF        | -1 |
|  |       | BDNF       | -1 |
|  |       | CCL5       | -1 |
|  |       | TSP-1      | -1 |
|  |       | RBP-4      | -1 |
|  |       | EGF        | -1 |
|  |       | IL-1ra     | -1 |
|  |       | CXCL10     | -1 |
|  |       | uPAR       | -1 |
|  |       | CSF2       | -1 |
|  |       | MMP-9      | -1 |
|  | dsRNA | CXCL5      | -1 |
|  |       | CHI3L1     | 1  |
|  |       | LCN2       | 1  |
|  |       | VDBP       | 1  |
|  |       | PDGF-AA    | 1  |
|  |       | CD31       | 1  |
|  |       | CCL2       | 1  |
|  |       | CXCL4      | 1  |
|  |       | CCL3/CCL4  | 1  |
|  | IFNa  | CXCL5      | -1 |
|  |       | CHI3L1     | 1  |
|  |       | LCN2       | 1  |
|  |       | VDBP       | 1  |
|  |       | PDGF-AA    | 1  |
|  |       | CD31       | 1  |
|  |       | CCL2       | 1  |
|  |       | CCL3/CCL4  | 1  |

|             |     |            |    |
|-------------|-----|------------|----|
|             |     | EGF        | 1  |
|             |     | CXCL10     | 1  |
|             |     | RETN       | 1  |
|             | LPS | CXCL1      | -1 |
|             |     | ApoA1      | -1 |
|             |     | LCN2       | -1 |
|             |     | IL-6       | -1 |
|             |     | VDBP       | -1 |
|             |     | CCL2       | -1 |
|             |     | PTX3       | -1 |
|             |     | IFNG       | -1 |
|             |     | CRP        | -1 |
|             |     | Ang-1      | -1 |
|             |     | CXCL4      | -1 |
|             |     | IL-1a      | -1 |
|             |     | BDNF       | -1 |
|             |     | CCL3/CCL4  | -1 |
|             |     | IL-1ra     | -1 |
|             |     | CSF2       | -1 |
|             |     | CD147      | -1 |
|             |     | RETN       | 1  |
| Gemcitabine | IAV | ApoA1      | -1 |
|             |     | LCN2       | -1 |
|             |     | IL-6       | -1 |
|             |     | VDBP       | -1 |
|             |     | Angiogenin | -1 |
|             |     | CFD        | -1 |
|             |     | CCL2       | -1 |
|             |     | CD31       | -1 |
|             |     | PTX3       | -1 |
|             |     | CCL7       | -1 |
|             |     | IFNG       | -1 |
|             |     | CRP        | -1 |
|             |     | Ang-1      | -1 |
|             |     | CXCL4      | -1 |
|             |     | MIF        | -1 |
|             |     | CCL5       | -1 |
|             |     | TSP-1      | -1 |
|             |     | BDNF       | -1 |
|             |     | RBP-4      | -1 |
|             |     | EGF        | -1 |
|             |     | IL-1ra     | -1 |

|  |      |           |    |
|--|------|-----------|----|
|  |      | uPAR      | -1 |
|  |      | CD147     | -1 |
|  |      | MMP-9     | -1 |
|  | IFNa | CXCL4     | -1 |
|  |      | RBP-4     | -1 |
|  | LPS  | ApoA1     | -1 |
|  |      | IL-6      | -1 |
|  |      | LCN2      | -1 |
|  |      | VDBP      | -1 |
|  |      | CD31      | -1 |
|  |      | CXCL4     | -1 |
|  |      | TNF-a     | -1 |
|  |      | CCL3/CCL4 | -1 |
|  |      | RBP-4     | -1 |
|  |      | CSF2      | -1 |
|  |      | MMP-9     | -1 |

**Table S4.** SaliPhe, SNS-032, obatoclax and gemcitabine, differentially affect production of several polar metabolites by stimulated PBMC-derived macrophages.

| Drug    | Stimulus | Metabolite       | FC, log2>1.5, <-1.5 |
|---------|----------|------------------|---------------------|
| No_drug | IAV      | SAM              | 2,78                |
|         |          | Inosine          | 2,40                |
|         |          | Creatine         | 2,33                |
|         |          | Adenosine        | 1,82                |
|         |          | Cotinine         | 1,71                |
|         |          | TMNO             | -2,70               |
|         | dsRNA    | Cotinine         | 1,74                |
|         |          | Creatine         | 1,66                |
|         |          | Aspartate        | -2,74               |
|         | IFNa     | SAM              | 2,12                |
|         |          | Aspartate        | -2,87               |
|         | LPS      | SAM              | 2,64                |
|         |          | SAH              | 1,75                |
|         |          | Aspartate        | -2,42               |
| SaliPhe | No_stim  | Cotinine         | 1,89                |
|         | IAV      | TMNO             | 1,64                |
|         |          | Inosine          | -2,04               |
|         | dsRNA    | TMNO             | -2,49               |
|         | LPS      | Glycocholic Acid | 2,29                |
|         |          | Creatine         | 1,59                |
|         |          | SAM              | -3,80               |
|         |          | Uracil           | -1,91               |
| SNS-032 | No_stim  | SAM              | 3,49                |

|             |         |                       |       |
|-------------|---------|-----------------------|-------|
|             |         | Inosine               | 2,92  |
|             |         | SAH                   | 2,11  |
|             |         | Sucrose               | 1,92  |
|             |         | Adenosine             | 1,75  |
|             |         | Chenodeoxycholic acid | 1,68  |
|             |         | Creatine              | 1,65  |
|             |         | TMNO                  | -2,12 |
|             | IAV     | TMNO                  | 1,64  |
|             |         | SAM                   | -1,72 |
|             | dsRNA   | Inosine               | 3,13  |
|             |         | Creatine              | -1,94 |
|             | IFNa    | Inosine               | 2,64  |
|             |         | SAH                   | 2,17  |
|             |         | Aspartate             | 1,90  |
|             |         | Adenosine             | 1,56  |
|             |         | Cotinine              | -2,28 |
|             | LPS     | Inosine               | 2,39  |
|             |         | SAM                   | -3,28 |
|             |         | TMNO                  | -1,61 |
| Obatoclox   | No_stim | Adenosine             | 3,19  |
|             |         | Succinate             | 2,03  |
|             |         | Cotinine              | 1,84  |
|             |         | Uracil                | 1,81  |
|             | IAV     | TMNO                  | 2,52  |
|             |         | Succinate             | 1,77  |
|             |         | Aspartate             | 1,62  |
|             |         | SAM                   | -2,03 |
|             |         | Inosine               | -1,61 |
|             | dsRNA   | SAM                   | 2,82  |
|             |         | Aspartate             | 2,44  |
|             |         | Adenosine             | 1,92  |
|             | IFNa    | Aspartate             | 2,92  |
|             |         | Adenosine             | 1,91  |
|             |         | Succinate             | 1,61  |
|             | LPS     | Aspartate             | 2,73  |
|             |         | Succinate             | 1,63  |
|             |         | Propionylcarnitine    | 1,54  |
|             |         | SAM                   | -2,35 |
|             |         | SAH                   | -2,16 |
| Gemcitabine | No_stim | Ornithine             | 1,86  |
|             |         | Isovalerylcarnitine   | 1,58  |
|             |         | SAM                   | -2,42 |

|  |       |                   |       |
|--|-------|-------------------|-------|
|  |       | Histidine         | -2,30 |
|  |       | 1-methylhistamine | -2,01 |
|  |       | Uracil            | -1,68 |
|  | IAV   | TMNO              | 2,39  |
|  |       | SAM               | -1,80 |
|  | dsRNA | TMNO              | -2,11 |
|  |       | Uracil            | -1,99 |
|  | IFNa  | SAM               | -2,82 |
|  |       | Uracil            | -2,67 |
|  | LPS   | SAH               | 1,89  |
|  |       | SAM               | 1,55  |
|  |       | Uracil            | -2,19 |
